# Supplementary material for: Chronic bronchitis without airflow obstruction, asthma and rhinitis are differently associated with cardiovascular risk factors and diseases
Source: PLoS One. 2019 Nov 7;14(11):e0224999. doi: 10.1371/journal.pone.0224999 (PMC6837508; doi:10.1371/journal.pone.0224999)
Supplement: S1 Dataset — (CSV) [file pone.0224999.s001.csv]

pseudoid	centre	case	HD	claudication	sex	age	smoke	alcohol	BMI	education	sedentary	diabetes	hypertension	dyslipidaemia
1	7	rhinitis	no	no	M	21	ex smoker	high	regular	higher	no	no	no	no
2	7	rhinitis	no	no	M	21	non smoker	moderate	regular	higher	yes	no	no	no
3	7	rhinitis	no	no	M	21	non smoker	no	overweight	higher	yes	no	no	no
4	7	asthma	no	no	M	21	smoker	no	regular	higher	yes	no	no	no
5	7	rhinitis	no	no	F	21	non smoker	no	regular	higher	no	no	no	no
6	2	asthma	no	no	M	22	smoker	moderate	regular	higher	no	no	no	no
7	7	rhinitis	no	no	M	22	smoker	no	regular	higher	no	no	no	no
8	7	asthma	no	no	M	22	non smoker	no	regular	higher	no	no	no	no
9	7	bronchitis	no	no	M	22	smoker	moderate	overweight	lower	no	no	no	no
10	7	asthma	no	no	M	22	smoker	moderate	regular	higher	no	no	no	no
11	7	rhinitis	no	no	M	22	ex smoker	no	overweight	higher	yes	no	no	no
12	7	control	no	no	M	22	smoker	high	overweight	higher	no	no	no	no
13	7	rhinitis	no	no	F	22	non smoker	no	regular	higher	no	no	no	no
14	7	bronchitis	no	no	F	22	non smoker	moderate	regular	higher	no	no	no	no
15	7	rhinitis	no	yes	F	22	ex smoker	moderate	regular	higher	no	no	no	no
16	4	asthma	no	no	M	23	non smoker	moderate	regular	lower	no	no	no	no
17	4	control	no	no	M	23	smoker		regular	higher	no	no	no	no
18	4	asthma	no	no	M	23	smoker	moderate	regular	higher	yes	no	no	no
19	7	bronchitis	no	no	M	23	smoker	moderate	regular	higher	yes	no	no	no
20	7	control	no	no	M	23	smoker	moderate	overweight	higher	no	no	no	no
21	7	control	no	no	M	23	non smoker	moderate	regular	higher	yes	no	no	no
22	7	control	no	no	M	23	non smoker	moderate	regular	higher	no	no	no	no
23	7	rhinitis	no	no	M	23	non smoker	moderate	regular	higher	no	no	no	no
24	7	control	no	no	M	23	non smoker	high	overweight	higher	no	no	no	no
25	2	rhinitis	no	no	F	23	non smoker	no	regular	higher	no	no	no	no
26	4	rhinitis	no	no	F	23	non smoker	moderate	overweight	higher	no	no	no	no
27	7	rhinitis	yes	no	F	23	smoker	no	regular	higher	yes	no	no	no
28	7	rhinitis	no	no	F	23	smoker	moderate	regular	higher	no	no	no	no
29	7	control	no	no	F	23	non smoker	no	regular	higher	no	no	no	no
30	7	control	no	no	F	23	non smoker	no	regular	higher	no	no	no	no
31	7	control	yes	no	F	23	non smoker	no	regular	higher	no	no	no	no
32	7	bronchitis	no	no	F	23	non smoker	moderate	regular	higher	no	no	no	yes
33	7	rhinitis	no	no	F	23	non smoker	no	overweight	higher	no	no	no	no
34	4	bronchitis	no	no	M	24	smoker	high	regular		no	no	no	no
35	7	asthma	no	no	M	24	non smoker	no	regular	higher	no	no	no	no
36	7	rhinitis	no	no	M	24	non smoker	moderate	regular	higher	no	no	no	no
37	2	control	no	no	F	24	non smoker	no	regular	higher	no	no	no	no
38	7	control	no	no	F	24	smoker	no	regular	higher	no	no	no	no
39	7	asthma	no	no	F	24	smoker	no	regular	higher	yes	no	no	no
40	7	control	no	no	F	24	smoker	moderate	obese	higher	no	no	no	no
41	7	bronchitis	no	no	F	24	smoker	moderate	overweight	higher	yes	no	no	no
42	7	asthma	no	no	F	24	non smoker	moderate	regular	higher	no	no	no	no
43	7	control	no	no	F	24	non smoker	no	obese	higher	no	no	no	no
44	4	bronchitis	no	no	M	25	non smoker	no	regular	higher	no	no	no	no
45	7	rhinitis	no	no	M	25	smoker	no	regular	higher	no	no	no	no
46	7	rhinitis	no	no	M	25	non smoker	moderate	overweight	higher	no	no	no	no
47	7	rhinitis	no	no	M	25	non smoker	moderate	regular	higher	no	no	no	no
48	7	rhinitis	no	no	M	25	ex smoker	moderate	obese	higher	yes	no	no	no
49	7	control	no	no	M	25	ex smoker	moderate	regular	higher	no	no	no	no
50	2	rhinitis	no	no	F	25	non smoker	no	overweight	higher	no	no	no	no
51	4	bronchitis	no	no	F	25	non smoker	no	regular	higher	no	no	no	no
52	4	asthma	no	no	F	25	non smoker	no	regular	higher	no	no	no	no
53	4	control	no	no	F	25	ex smoker	no	regular	higher	yes	no	no	no
54	7	bronchitis	no	no	F	25	non smoker	moderate	regular	higher	no	no	no	no
55	7	rhinitis	no	no	F	25	smoker	moderate	obese	higher	no	no	no	no
56	7	rhinitis	no	no	F	25	non smoker	no	regular	higher	no	no	no	no
57	4	rhinitis	no	no	M	26	non smoker	high	regular	higher	no	no	no	no
58	4	rhinitis	no	no	M	26	non smoker	moderate		higher	yes	no	no	no
59	4	rhinitis	no	no	M	26	non smoker	moderate	regular	higher	no	no	no	no
60	7	rhinitis	no	no	M	26	smoker	moderate	regular	higher	no	no	no	no
61	7	rhinitis	no	yes	M	26	ex smoker	no	overweight	higher	no	no	no	no
62	7	control	no	no	M	26	non smoker	moderate	regular	higher	no	no	no	no
63	7	rhinitis	no	no	M	26	smoker	no	regular	higher	no	no	no	no
64	4	control	no	no	F	26	non smoker	no	regular	higher	no	no	no	no
65	7	asthma	no	no	F	26	smoker	no	regular	higher	yes	no	no	no
66	7	control	no	no	F	26	non smoker	no	regular	higher	no	no	no	no
67	7	control	no	no	F	26	non smoker	moderate	regular	higher	no	no	no	no
68	7	asthma	no	no	M	27	smoker	high	regular	higher	yes	no	no	no
69	7	rhinitis	no	no	M	27	non smoker	high	regular	higher	no	no	no	no
70	7	asthma	no	no	M	27	smoker	high	regular	higher	no	no	no	no
71	7	rhinitis	no	no	M	27	non smoker	high	overweight	higher	no	no	no	no
72	4	asthma	no	no	F	27	smoker	high	regular	higher	yes	no	no	no
73	7	bronchitis	no	no	F	27	ex smoker	no	regular	higher	yes	no	no	no
74	7	control	no	no	F	27	non smoker	moderate	regular	higher	no	no	no	no
75	7	rhinitis	no	no	F	27	smoker		obese	higher	yes	no	no	no
76	7	control	no	no	F	27	smoker	moderate	regular	higher	no	no	no	no
77	7	control	no	no	F	27	non smoker	moderate	overweight	higher	yes	no	no	yes
78	4	bronchitis	no	no	M	28	smoker	high	overweight	higher	no	no	no	no
79	7	asthma	no	no	M	28	ex smoker	high	overweight	higher	no	no	yes	yes
80	7	asthma	no	no	M	28	non smoker	no	overweight	higher	no	no	no	no
81	7	asthma	no	no	M	28	smoker	high	regular	higher	no	no	no	no
82	7	rhinitis	no	no	M	28	non smoker	no	regular	higher	yes	no	no	no
83	7	control	no	no	M	28	non smoker	moderate	regular	higher	yes	no	no	no
84	7	bronchitis	no	no	M	28	smoker	high	regular	higher	no	no	no	no
85	7	rhinitis	yes	no	M	28	non smoker	moderate	regular	higher	no	no	no	no
86	7	control	no	no	M	28	non smoker	no	obese	higher	no	no	no	no
87	2	rhinitis	no	no	F	28	ex smoker	moderate	regular	higher	no	no	no	yes
88	4	asthma	no	no	F	28	smoker		regular	higher	yes	no	no	yes
89	4	asthma	no	no	F	28	non smoker	no	regular	higher	yes	no	no	yes
90	4	control	no	no	F	28	non smoker	moderate	regular	higher	no	no	no	no
91	7	rhinitis	no	no	F	28	non smoker	high	regular	higher	yes	no	no	no
92	7	control	no	no	F	28	non smoker	moderate	regular	higher	no	no	no	no
93	4	bronchitis	no	no	M	29	smoker	high	regular	higher	no	no	no	no
94	4	asthma	no	no	M	29	non smoker	moderate	regular	higher	yes	no	no	no
95	7	control	no	no	M	29	smoker	no	overweight	higher	yes	no	no	no
96	7	rhinitis	no	no	M	29	smoker	moderate	overweight	higher	no	no	no	no
97	7	bronchitis	no	no	M	29	smoker	moderate	obese	higher	no	no	no	no
98	7	rhinitis	no	no	M	29	ex smoker	high	regular	higher	no	no	no	yes
99	7	asthma	no	no	M	29	smoker	high	overweight	higher	yes	no	no	no
100	7	rhinitis	no	no	M	29	non smoker	high	overweight	higher	no	no	no	yes
101	7	asthma	no	no	M	29	smoker	no	overweight	higher	yes	no	no	no
102	4	rhinitis	no	no	F	29	non smoker	no	regular	higher	yes	no	no	yes
103	7	rhinitis	no	no	F	29	ex smoker	no	regular	higher	no	no	no	no
104	7	rhinitis	no	no	F	29	non smoker	moderate	regular	higher	no	no	no	no
105	7	bronchitis	no	no	F	29	smoker	high	obese	higher	yes	no	no	no
106	7	control	no	no	F	29	non smoker	no	regular	higher	no	no	no	no
107	7	asthma	no	no	F	29	smoker	no	regular	higher	no	no	no	yes
108	7	control	no	no	F	29	smoker	no	regular	higher	no	no	no	no
109	7	rhinitis	no	no	F	29	non smoker	no	regular	higher	yes	no	no	yes
110	7	rhinitis	no	no	F	29	non smoker	moderate	regular	higher	yes	no	no	yes
111	2	rhinitis	no	no	M	30	smoker	high	overweight	higher	no	no	yes	no
112	2	asthma	no	no	M	30	smoker	no	overweight	higher	yes	no	no	yes
113	2	control	yes	no	M	30	non smoker	no	overweight	higher	no	no	no	no
114	4	rhinitis	no	no	M	30	smoker	high	overweight	higher	no	no	no	no
115	7	rhinitis	no	no	M	30	smoker	high	overweight	higher	no	no	no	no
116	7	control	no	no	M	30	smoker	moderate	regular	higher	no	no	no	no
117	7	bronchitis	no	no	M	30	smoker	high	regular	higher	yes	no	no	yes
118	7	asthma	no	no	M	30	non smoker	no	regular	higher	no	no	no	no
119	7	rhinitis	no	no	M	30	non smoker	no	regular	higher	no	no	no	no
120	7	control	no	yes	M	30	ex smoker	moderate	obese	higher	yes	no	no	no
121	7	rhinitis	no	no	M	30	non smoker	no	regular	higher	no	no	no	no
122	2	control	no	no	F	30	smoker	moderate	regular	higher	yes	no	no	no
123	2	asthma	no	no	F	30	non smoker	no	regular	higher	yes	no	no	no
124	2	control	yes	no	F	30	ex smoker	high	regular	higher	no	no	no	no
125	7	asthma	yes	no	F	30	non smoker	no	regular	higher	no	no	no	no
126	7	rhinitis	no	no	F	30	non smoker	moderate	regular	higher	no	no	no	yes
127	7	asthma	no	no	F	30	non smoker	no	regular	higher	no	no	no	no
128	7	control	yes	no	F	30	non smoker	no	regular	higher	no	no	no	no
129	7	rhinitis	yes	no	F	30	ex smoker	no	regular	higher	no	no	no	no
130	7	rhinitis	no	no	F	30	non smoker	no	regular	higher	yes	no	no	no
131	11	asthma	no	no	M	31	non smoker	high	regular	higher	no	no	no	no
132	4	asthma	no	no	M	31	smoker	moderate	regular	higher	yes	no	no	no
133	7	bronchitis	no	no	M	31	smoker		regular	higher	yes	no	no	no
134	7	control	no	no	M	31	smoker	moderate	overweight	higher	yes	no	no	yes
135	7	asthma	no	no	M	31	non smoker	no	overweight	higher	no	no	no	yes
136	7	rhinitis	no	no	M	31	smoker	moderate	regular	higher	no	no	no	no
137	7	control	no	no	M	31	non smoker	moderate	regular	higher	no	no	no	no
138	7	asthma	no	no	M	31	ex smoker	moderate	regular	higher	yes	no	no	no
139	7	rhinitis	no	no	M	31	smoker	moderate	regular	higher	yes	no	no	no
140	7	bronchitis	yes	no	M	31	smoker	moderate	regular	higher	no	no	no	no
141	7	rhinitis	no	no	M	31	smoker	high	regular	higher	no	no	no	no
142	7	bronchitis	no	no	M	31	ex smoker	high	regular	higher	no	no	no	no
143	7	rhinitis	yes	no	M	31	smoker	high	regular	higher	no	no	no	no
144	7	rhinitis	no	no	M	31	non smoker	no	overweight	higher	no	no	no	no
145	4	control	yes	no	F	31	ex smoker	moderate	regular	higher	no	no	no	no
146	4	bronchitis	no	no	F	31	non smoker	no	regular	higher	yes	no	no	no
147	4	rhinitis	no	no	F	31	non smoker	no		higher	no	no	no	yes
148	4	rhinitis	no	no	F	31	smoker	moderate		higher	no	no	no	no
149	7	asthma	no	no	F	31	non smoker	no	regular	higher	no	no	no	no
150	7	rhinitis	yes	no	F	31	non smoker	no	regular	higher	yes	no	no	no
151	7	bronchitis	no	no	F	31	smoker	no	regular	higher	no	no	no	no
152	7	rhinitis	no	no	F	31	non smoker	moderate	regular	higher	no	no	no	no
153	7	control	no	no	F	31	non smoker	no	regular	higher	no	no	no	no
154	7	asthma	no	no	F	31	non smoker	moderate	regular	higher	no	no	no	no
155	7	rhinitis	no	no	F	31	non smoker	no	obese	higher	yes	no	no	no
156	7	rhinitis	no	no	F	31	non smoker	no	regular	higher	yes	no	no	no
157	7	control	no	no	F	31	non smoker	moderate	regular	higher	no	no	no	no
158	7	asthma	no	no	F	31	ex smoker	no	regular	higher	no	no	no	no
159	7	control	no	no	F	31	smoker	moderate	regular	higher	no	no	no	yes
160	2	control	yes	no	M	32	non smoker	no	regular	higher	no	no	no	yes
161	11	asthma	no	no	M	32	non smoker	no	regular	higher	no	no	no	no
162	11	control	no	no	M	32	non smoker	moderate	overweight	higher	no	yes	no	no
163	11	asthma	no	no	M	32	ex smoker	no	obese	higher	no	no	yes	yes
164	11	rhinitis			M	32			regular
165	7	rhinitis	no	no	M	32	non smoker	no	overweight	higher	no	no	no	no
166	7	asthma	no	no	M	32	ex smoker	no	overweight	higher	no	no	no	no
167	7	asthma	no	no	M	32	non smoker	moderate	regular	higher	yes	no	no	no
168	7	rhinitis	yes	no	M	32	ex smoker	no	overweight	higher	no	no	yes	yes
169	7	rhinitis	no	no	M	32	non smoker	moderate	obese	lower	no	no	yes	no
170	7	rhinitis	no	no	M	32	non smoker	high	regular	higher	yes	no	no	no
171	7	control	no	no	M	32	non smoker	no	regular	lower	yes	no	no	no
172	7	rhinitis	no	no	M	32	ex smoker	no	regular	higher	no	no	no	no
173	7	control	no	no	M	32	non smoker	no	regular	higher	no	no	no	no
174	7	rhinitis	no	no	M	32	non smoker	moderate	regular	higher	no	no	no	no
175	7	asthma	no	no	M	32	non smoker	high	regular	higher	no	no	no	no
176	7	rhinitis	no	no	M	32	smoker	no	overweight	higher	yes	no	no	no
177	7	control	no	no	M	32	ex smoker	high	overweight	higher	yes	no	no	no
178	7	rhinitis	no	no	M	32	non smoker	moderate	overweight	higher	yes	no	yes	yes
179	8	rhinitis	no	no	M	32	ex smoker	moderate	overweight	higher	no	no	no	yes
180	2	control	no	no	F	32	ex smoker	no	regular	higher	yes	no	no	no
181	4	asthma	no	no	F	32	smoker	high	regular	higher	yes	no	yes	yes
182	7	rhinitis	no	no	F	32	non smoker	no	regular	higher	no	no	no	no
183	7	asthma	no	no	F	32	smoker	moderate	regular	higher	no	no	yes	no
184	7	rhinitis	no	no	F	32	non smoker	no	regular	higher	yes	no	no	no
185	7	rhinitis	no	no	F	32	smoker	no	regular	higher	yes	no	no	no
186	7	control	no	no	F	32	smoker	moderate	regular	higher	no	no	no	no
187	7	rhinitis	no	yes	F	32	ex smoker	moderate	regular	higher	no	no	no	no
188	7	rhinitis	no	no	F	32	non smoker	no	regular	higher	no	no	no	no
189	7	control	no	no	F	32	smoker	moderate	regular	higher	no	no	no	no
190	7	control	no	no	F	32	non smoker	no	overweight	lower	no	no	no	no
191	8	control	no	no	F	32	ex smoker	no	regular	higher	yes	no	no	no
192	8	rhinitis	no	no	F	32	non smoker	no	regular	higher	no	no	no	no
193	2	control	no	no	M	33	non smoker	no	regular	higher	yes	no	no	no
194	11	rhinitis	no	no	M	33	non smoker	high	regular	higher	yes	no	no	no
195	11	asthma	no	no	M	33	smoker	moderate	regular	higher	no	no	no	no
196	11	asthma	no	no	M	33	smoker		regular	higher	no	no	no	no
197	7	asthma	no	no	M	33	non smoker	no	regular	higher	no	no	no	no
198	7	control	no	no	M	33	non smoker	moderate	regular	higher	yes	no	no	no
199	7	bronchitis	no	no	M	33	ex smoker	moderate	overweight	higher	no	no	no	no
200	7	bronchitis	no	no	M	33	non smoker	moderate	regular	higher	no	no	no	yes
201	7	asthma	no	no	M	33	smoker	moderate	overweight	higher	no	no	no	yes
202	7	asthma	no	no	M	33	ex smoker	no	regular	higher	no	no	no	no
203	7	rhinitis	no	no	M	33	smoker	moderate	regular	higher	yes	no	no	no
204	7	asthma	no	no	M	33	smoker	moderate	overweight	higher	no	no	no	no
205	7	bronchitis	no	no	M	33	smoker	no	overweight	higher	yes	no	no	no
206	7	control	no	no	M	33	non smoker	moderate	regular	higher	yes	no	no	no
207	7	asthma	no	no	M	33	non smoker	no	overweight	higher	no	no	no	yes
208	7	control	no	no	M	33	ex smoker	no	regular	higher	no	no	no	no
209	11	rhinitis	no	no	F	33	non smoker	no	regular	higher	yes	no	no	no
210	4	asthma	no	no	F	33	non smoker	no	overweight	higher	yes	no	no	no
211	4	asthma	no	no	F	33	non smoker	no	regular		yes	no	no	no
212	7	rhinitis	no	no	F	33	non smoker	no	regular	higher	yes	no	no	no
213	7	rhinitis	no	no	F	33	non smoker	moderate	regular	higher	no	no	no	no
214	7	rhinitis	no	no	F	33	smoker	no	regular	higher	no	no	no	no
215	7	control	yes	no	F	33	ex smoker	high	regular	higher	no	no	no	no
216	7	control	no	no	F	33	ex smoker	no	regular	higher	yes	no	no	no
217	7	control	no	no	F	33	smoker	no	regular	higher	yes	no	no	no
218	7	asthma	no	no	F	33	smoker	moderate	overweight	higher	yes	no	no	yes
219	7	asthma	no	no	F	33	non smoker	no	obese	higher	no	no	no	no
220	7	rhinitis	no	no	F	33	non smoker	no	overweight	higher	no	no	no	no
221	7	asthma	no	no	F	33	ex smoker	moderate	regular	higher	yes	no	no	no
222	7	asthma	no	no	F	33	non smoker	no	overweight	lower	yes	no	no	no
223	7	bronchitis	no	no	F	33	ex smoker	moderate	regular	higher	no	no	no	no
224	7	control	no	no	F	33	non smoker	no	regular	higher	no	no	no	no
225	7	control	no	no	F	33	non smoker	no	overweight	higher	no	no	no	no
226	7	rhinitis	yes	no	F	33	non smoker	no	regular	higher	no	no	no	no
227	7	rhinitis	no	no	F	33	non smoker	no	regular	higher	yes	no	no	no
228	7	control	no	no	F	33	smoker	moderate	regular	higher	no	no	no	no
229	8	rhinitis	no	no	F	33	non smoker	no	regular	higher	no	no	no	no
230	11	control	no	no	M	34	non smoker	moderate	regular	higher	no	no	no	yes
231	11	asthma	no	no	M	34	non smoker	moderate	obese	higher	no	no	no	no
232	4	asthma	no	no	M	34	smoker	moderate	regular	higher	no	no	no	no
233	4	rhinitis	no	no	M	34	smoker	no	regular	higher	no	no	no	no
234	7	rhinitis	yes	no	M	34	smoker	high	regular	higher	no	no	no	no
235	7	asthma	no	no	M	34	ex smoker	moderate	obese	higher	yes	no	no	no
236	7	rhinitis	no	no	M	34	ex smoker	no	overweight	higher	yes	no	no	yes
237	7	rhinitis	no	no	M	34	non smoker	high	overweight	higher	yes	no	no	no
238	7	control	no	no	M	34	ex smoker	moderate	overweight	higher	no	no	no	no
239	7	control	no	no	M	34	smoker	high	regular	higher	yes	no	no	no
240	7	control	no	no	M	34	smoker	moderate	regular	higher	no	no	no	no
241	7	control	no	no	M	34	ex smoker	moderate	overweight	higher	no	no	no	yes
242	7	control	no	no	M	34	smoker	no	obese	higher	yes	no	no	no
243	7	rhinitis	no	no	M	34	ex smoker	moderate	regular	higher	no	no	no	no
244	7	rhinitis	yes	no	M	34	non smoker	no	overweight	higher	no	no	no	no
245	7	control	no	no	M	34	non smoker	moderate	overweight	higher	yes	no	no	no
246	7	control	no	no	M	34	smoker	moderate	regular	higher	no	no	no	no
247	7	asthma	no	no	M	34	ex smoker	moderate	overweight	higher	no	no	no	no
248	7	asthma	no	no	M	34	smoker	no	regular	higher	no	no	no	no
249	7	control	no	no	M	34	ex smoker	high	regular	higher	no	no	no	no
250	7	control	no	no	M	34	non smoker	high	regular	higher	yes	no	no	no
251	7	asthma	no	no	M	34	ex smoker	moderate	regular	higher	yes	no	no	no
252	8	rhinitis	no	no	M	34	non smoker	no		higher	yes	no	no	no
253	11	rhinitis	no	yes	F	34	non smoker	no	overweight	higher	yes	no	no	no
254	4	rhinitis	no	no	F	34	non smoker	no	regular	higher	no	no	no	no
255	4	control	no	no	F	34	smoker	no	overweight	higher	no	no	no	yes
256	4	bronchitis	no	no	F	34	ex smoker	no	regular	higher	yes	no	no	no
257	7	control	no	no	F	34	non smoker	no	regular	higher	no	no	no	no
258	7	control	no	no	F	34	ex smoker	no	obese	higher	yes	no	no	no
259	7	control	no	no	F	34	ex smoker	no	regular	higher	yes	no	no	no
260	7	rhinitis	no	no	F	34	smoker	no	regular	higher	yes	no	no	no
261	7	rhinitis	no	no	F	34	ex smoker	moderate	regular	higher	yes	no	no	no
262	7	bronchitis	no	no	F	34	non smoker	no	regular	higher	no	no	no	yes
263	7	bronchitis	no	no	F	34	non smoker	no	overweight	higher	yes	no	no	no
264	7	rhinitis	no	no	F	34	non smoker	no	regular	higher	yes	no	no	no
265	7	asthma	no	no	F	34	smoker	moderate	regular	higher	no	no	no	no
266	7	control	no	no	F	34	non smoker	no	regular	higher	no	no	no	no
267	7	control	no	no	F	34	smoker	no	regular	higher	yes	no	no	no
268	7	control	no	no	F	34	ex smoker	no	overweight	higher	no	no	no	no
269	7	rhinitis	no	no	F	34	smoker	moderate	regular	higher	no	no	yes	yes
270	7	rhinitis	yes	no	F	34	non smoker	no	regular	higher	no	no	no	yes
271	7	rhinitis	no	no	F	34	smoker	no	regular	higher	no	no	no	yes
272	7	control	no	no	F	34	non smoker	no	regular	higher	no	no	no	no
273	7	rhinitis	no	no	F	34	non smoker	no	regular	higher	no	no	no	no
274	8	rhinitis	no	no	F	34	smoker	no	regular	higher	no	no	no	no
275	11	rhinitis	no	no	M	35	non smoker	no	regular	higher	no	no	no	no
276	11	control	no	no	M	35	smoker	no	obese	higher	yes	no	no	yes
277	11	bronchitis	no	no	M	35	non smoker	high	overweight	higher	yes	no	no	no
278	11	asthma	no	no	M	35	non smoker	moderate	obese	lower	yes	no	no	no
279	7	control	no	no	M	35	smoker	high	regular	higher	no	no	no	yes
280	7	rhinitis	no	no	M	35	ex smoker		regular	higher	yes	no	no	no
281	7	asthma	no	no	M	35	ex smoker	no	overweight	higher	yes	no	no	no
282	7	control	no	no	M	35	smoker	moderate	overweight	higher	yes	no	no	no
283	7	rhinitis	no	no	M	35	non smoker	no	regular	higher	no	no	yes	no
284	7	rhinitis	no	no	M	35	non smoker	moderate	overweight	higher	no	no	no	no
285	7	asthma	no	no	M	35	non smoker	no	regular	higher	no	no	yes	no
286	7	bronchitis	yes	no	M	35	smoker	moderate	regular	higher	yes	no	yes	no
287	7	control	no	no	M	35	non smoker	no	regular	higher	no	no	no	no
288	7	control	no	no	M	35	smoker	moderate	overweight	lower	yes	no	no	no
289	7	rhinitis	no	no	M	35	ex smoker	moderate	regular	higher	no	no	yes	no
290	7	bronchitis	no	no	M	35	non smoker	moderate	regular	higher	no	no	no	no
291	7	rhinitis	no	no	M	35	non smoker	moderate	regular	higher	no	no	no	no
292	7	asthma	no	no	M	35	smoker	no	regular	higher	no	no	no	yes
293	7	control	no	no	M	35	ex smoker	moderate	overweight	higher	no	no	no	no
294	7	control	no	no	M	35	smoker	moderate	regular	higher	no	no	yes	yes
295	7	rhinitis	no	no	M	35	non smoker	moderate	regular	higher	yes	no	no	no
296	2	control	no	no	F	35	smoker	no	obese	higher	no	no	no	no
297	2	asthma	no	no	F	35	non smoker	no	regular	higher	no	no	no	no
298	2	rhinitis	no	no	F	35	non smoker	no	regular	higher	no	no	no	no
299	2	bronchitis	no	no	F	35	smoker	no	regular	higher	yes	no	no	no
300	11	asthma	no	no	F	35	non smoker	no	regular	higher	yes	no	no	no
301	4	asthma	no	no	F	35	non smoker	no	regular	higher	no	no	no	no
302	4	bronchitis	no	no	F	35	non smoker	no	regular	lower	yes	no	no	no
303	4	rhinitis	no	no	F	35	non smoker	no	regular	higher	yes	no	no	no
304	7	rhinitis	no	no	F	35	non smoker	moderate	regular	higher	yes	no	no	no
305	7	rhinitis	no	no	F	35	non smoker	no	overweight	higher	yes	no	no	no
306	7	control	no	no	F	35	non smoker	no	regular	lower	yes	no	no	no
307	7	asthma	no	no	F	35	smoker	no	regular	higher	yes	no	yes	yes
308	7	rhinitis	yes	no	F	35	non smoker	no	regular	higher	no	no	no	no
309	7	rhinitis	yes	no	F	35	smoker	high	regular	higher	yes	no	no	no
310	7	rhinitis	no	no	F	35	non smoker	no	regular	higher	yes	no	no	no
311	7	rhinitis	no	no	F	35	non smoker	no	regular	higher	no	no	no	no
312	7	control	yes	no	F	35	smoker	no	regular	higher	yes	no	yes	no
313	7	rhinitis	no	no	F	35	non smoker	no	regular	higher	yes	no	no	no
314	7	rhinitis	no	no	F	35	non smoker	no	regular	higher	no	no	no	no
315	7	control	no	no	F	35	non smoker	no	regular	higher	no	no	no	no
316	7	control	no	no	F	35	non smoker	no	regular		no	no	no	no
317	7	control	no	no	F	35	non smoker	no	regular	lower	no	no	no	no
318	11	asthma	no	no	M	36	ex smoker	moderate	regular	higher	yes	no	no	no
319	11	rhinitis	no	no	M	36	non smoker	moderate	regular	higher	no	no	no	no
320	11	asthma	no	no	M	36	ex smoker	moderate	overweight	higher	no	no	no	yes
321	4	asthma	no	no	M	36	non smoker	no	overweight	higher	yes	no	no	no
322	4	control	no	no	M	36	smoker	moderate	overweight	higher	no	no	no	no
323	7	bronchitis	no	no	M	36	smoker	high	overweight	lower	yes	no	no	yes
324	7	rhinitis	no	no	M	36	non smoker	no	overweight	higher	yes	no	yes	no
325	7	asthma	no	no	M	36	ex smoker	high	obese	higher	no	no	no	no
326	7	bronchitis	no	no	M	36	smoker	high	obese	higher	yes	no	no	no
327	7	rhinitis	yes	no	M	36	non smoker	moderate	obese	higher	yes	no	yes	no
328	7	control	no	no	M	36	non smoker	moderate	overweight	higher	yes	no	no	yes
329	7	control	no	no	M	36	non smoker	moderate	regular	higher	no	no	no	no
330	7	rhinitis	no	no	M	36	smoker	moderate	obese	higher	yes	no	no	no
331	7	rhinitis	no	no	M	36	non smoker	moderate	overweight	higher	no	no	no	no
332	7	rhinitis	yes	no	M	36	smoker	high	regular	higher	no	no	yes	no
333	7	rhinitis	no	no	M	36	ex smoker	high	regular	higher	yes	no	no	no
334	7	rhinitis	no	no	M	36	non smoker	no	regular	higher	no	no	no	no
335	7	asthma	no	no	M	36	ex smoker	high	regular	higher	yes	no	no	no
336	7	rhinitis	no	no	M	36	smoker	moderate	regular	higher	no	no	no	no
337	7	rhinitis	yes	no	M	36	non smoker	moderate	overweight	higher	yes	no	no	no
338	8	rhinitis	no	no	M	36	smoker	no	regular	higher	no	no	no	yes
339	8	rhinitis	no	no	M	36	non smoker	no		lower	no	no	no	no
340	2	rhinitis	no	no	F	36	non smoker	no	regular	higher	yes	no	no	no
341	2	asthma	no	no	F	36	non smoker	no	overweight	higher	no	no	no	no
342	11	bronchitis	no	yes	F	36	smoker	no	regular	higher	yes	no	no	yes
343	11	control	no	no	F	36	non smoker	no	regular	higher	yes	no	no	no
344	11	asthma	no	no	F	36	non smoker	no	regular	higher	no	no	yes	no
345	11	bronchitis	no	no	F	36	non smoker	no	regular	higher	yes	no	no	no
346	4	rhinitis	no	no	F	36	smoker	moderate	regular	higher	no	no	no	yes
347	4	bronchitis	no	yes	F	36	smoker	no	overweight	lower	no	no	no	no
348	4	asthma	no	no	F	36	ex smoker	moderate	regular	higher	no	no	yes	yes
349	7	asthma	no	no	F	36	smoker	moderate	regular	higher	no	no	no	no
350	7	control	no	no	F	36	smoker	moderate	regular	higher	no	no	no	no
351	7	bronchitis	no	no	F	36	smoker	moderate	regular	higher	yes	no	no	yes
352	7	rhinitis	no	no	F	36	non smoker	moderate	regular	higher	no	no	no	no
353	7	bronchitis	no	yes	F	36	non smoker	no	regular	higher	yes	no	yes	yes
354	7	rhinitis	no	no	F	36	non smoker	no	obese	higher	yes	no	no	no
355	7	bronchitis	no	no	F	36	smoker	no	overweight	higher	no	no	no	yes
356	7	bronchitis	yes	no	F	36	non smoker	no	regular	higher	no	no	no	yes
357	7	rhinitis	no	no	F	36	non smoker	no	regular	higher	yes	no	no	no
358	7	asthma	no	no	F	36	ex smoker	no	regular	higher	yes	no	no	no
359	7	control	no	no	F	36	smoker	no	regular	higher	yes	no	no	no
360	7	asthma	no	no	F	36	non smoker	moderate	regular	higher	no	no	no	no
361	7	rhinitis	yes	no	F	36	smoker	no	regular	lower	no	no	no	no
362	7	rhinitis	no	no	F	36	ex smoker	moderate	regular	higher	yes	no	no	no
363	7	asthma	yes	yes	F	36	ex smoker	no	overweight	higher	no	no	no	no
364	7	control	no	no	F	36	ex smoker	no	regular	higher	yes	no	no	no
365	8	asthma	yes	no	F	36	non smoker	no	regular	higher	yes	no	no	no
366	8	bronchitis	no	no	F	36	non smoker	no	obese	higher	yes	no	no	no
367	8	control	no	no	F	36	non smoker	no	overweight	higher	yes	no	no	no
368	8	rhinitis	no	no	F	36	non smoker	no	regular	higher	yes	no	no	no
369	8	rhinitis	no	no	F	36	non smoker	no	regular	higher	yes	no	no	no
370	8	asthma	no	no	F	36	ex smoker	no	overweight	higher	no	no	no	no
371	11	rhinitis	no	no	M	37	ex smoker	moderate	regular	higher	yes	no	no	no
372	11	asthma	no	no	M	37	smoker	moderate	regular	higher	yes	no	no	no
373	11	asthma	no	no	M	37	non smoker		regular	higher	yes	no	no	no
374	11	asthma	no	no	M	37	non smoker	no	regular	higher	no	no	no	yes
375	11	control	no	no	M	37	non smoker	no	regular	higher	yes	no	no	no
376	11	asthma	no	no	M	37	smoker	moderate	regular	higher	yes	no	no	no
377	11	rhinitis	no	yes	M	37	non smoker	no	regular	higher	no	no	no	yes
378	4	asthma	no	no	M	37	ex smoker	high	regular	higher	no	no	no	no
379	4	rhinitis	no	no	M	37	ex smoker	no	overweight	higher	no	no	no	no
380	4	bronchitis	no	yes	M	37	non smoker	moderate	regular	higher	yes	no	no	yes
381	4	rhinitis	no	no	M	37	non smoker	no	overweight	higher	yes	no	no	no
382	7	bronchitis	no	no	M	37	smoker	high	regular	higher	yes	no	yes	no
383	7	rhinitis	no	no	M	37	non smoker	no	overweight	higher	no	no	no	no
384	7	rhinitis	yes	no	M	37	smoker	moderate	obese	higher	yes	no	no	no
385	7	rhinitis	no	no	M	37	ex smoker	moderate	regular	higher	no	no	no	no
386	7	asthma	no	no	M	37	non smoker	moderate	overweight	higher	no	no	no	no
387	7	asthma	no	no	M	37	non smoker	moderate	overweight	higher	no	no	no	no
388	7	control	no	no	M	37	ex smoker	moderate	overweight	higher	no	no	no	yes
389	7	rhinitis	no	no	M	37	non smoker	high	regular	higher	yes	no	yes	yes
390	7	control	no	no	M	37	smoker	moderate	regular	higher	yes	no	no	no
391	7	rhinitis	no	no	M	37	non smoker	moderate	regular	higher	yes	no	no	no
392	7	rhinitis	no	no	M	37	ex smoker	moderate	regular	higher	no	no	no	no
393	7	rhinitis	no	no	M	37	non smoker	moderate	overweight	higher	no	no	no	no
394	7	control	no	no	M	37	smoker	no	regular	higher	no	no	no	no
395	7	rhinitis	no	no	M	37	smoker	no	regular	higher	yes	no	no	no
396	7	bronchitis	no	no	M	37	non smoker	moderate	regular	higher	no	no	no	no
397	7	control	no	no	M	37	non smoker	no	obese	lower	yes	no	no	no
398	7	rhinitis	no	no	M	37	ex smoker	no	regular	higher	no	no	no	no
399	7	asthma	no	no	M	37	non smoker		overweight	higher	yes	no	yes	no
400	8	control	no	no	M	37	smoker	moderate	regular	higher	no	no	no	yes
401	8	asthma	no	no	M	37	ex smoker	moderate	obese	higher	yes	no	no	no
402	2	rhinitis	no	no	F	37	non smoker	no	regular	higher	yes	no	no	no
403	2	rhinitis	no	no	F	37	non smoker	no	overweight	higher	yes	no	no	no
404	2	control	no	no	F	37	non smoker	no	regular	higher	no	no	no	no
405	11	control	no	no	F	37	non smoker	no	regular	higher	yes	no	no	no
406	4	control	no	no	F	37	ex smoker	moderate	regular	higher	yes	no	no	no
407	7	asthma	no	no	F	37	non smoker	no	overweight	higher	yes	no	no	no
408	7	asthma	no	no	F	37	non smoker	no	regular	higher	yes	no	no	no
409	7	rhinitis	no	no	F	37	non smoker	no	regular	higher	yes	no	no	no
410	7	asthma	no	no	F	37	smoker	no	regular	higher	no	no	no	no
411	7	control	no	no	F	37	ex smoker	moderate	regular	higher	no	no	no	no
412	7	control	yes	yes	F	37	non smoker	no	regular	higher	no	no	no	no
413	7	control	no	no	F	37	non smoker	no	regular	higher	yes	no	no	no
414	7	asthma	no	no	F	37	ex smoker	moderate	obese	higher	no	no	no	no
415	7	control	no	no	F	37	ex smoker	moderate	regular	lower	no	no	no	no
416	7	bronchitis	no	no	F	37	smoker	moderate	overweight	higher	no	no	yes	no
417	7	control	no	no	F	37	non smoker	no	regular	higher	yes	no	no	no
418	7	control	no	no	F	37	smoker	moderate	regular	higher	no	no	no	no
419	7	bronchitis	no	no	F	37	non smoker	no	obese	higher	no	no	yes	no
420	7	control	no	no	F	37	smoker	no	regular	higher	yes	no	no	yes
421	7	control	no	no	F	37	smoker	moderate	regular	higher	yes	no	no	yes
422	7	control	no	no	F	37	ex smoker	moderate	regular	higher	no	no	no	yes
423	11	control	no	no	M	38	non smoker	moderate	regular	higher	no	no	no	no
424	11	asthma	no	no	M	38	ex smoker	high	obese	higher	yes	no	no	yes
425	11	control	no	no	M	38	non smoker	moderate	overweight	higher	no	no	no	no
426	11	rhinitis	no	no	M	38	non smoker	no	regular	higher	no	no	no	no
427	4	asthma	no	no	M	38	smoker	moderate	overweight	higher	no	no	no	yes
428	4	asthma	no	no	M	38	non smoker	no	obese	higher	yes	yes	no	yes
429	4	asthma	no	no	M	38	smoker	no	overweight	higher	no	no	no	no
430	4	rhinitis	no	no	M	38	non smoker	moderate	regular	higher	yes	no	no	yes
431	4	asthma	no	no	M	38	non smoker	moderate	overweight	higher	no	no	no	no
432	7	bronchitis	no	no	M	38	smoker	moderate	overweight	lower	yes	no	no	no
433	7	control	no	no	M	38	ex smoker	moderate	regular	higher	yes	no	no	no
434	7	control	no	no	M	38	smoker	moderate	overweight	higher	yes	no	no	no
435	7	rhinitis	yes	no	M	38	non smoker	no	obese	higher	no	no	no	no
436	7	rhinitis	no	no	M	38	ex smoker	moderate	obese	lower	no	no	no	no
437	7	bronchitis	no	no	M	38	smoker	no	regular	higher	yes	no	no	no
438	7	rhinitis	no	no	M	38	non smoker	no	overweight	higher	no	no	no	no
439	7	rhinitis	no	no	M	38	non smoker	moderate	obese	higher	yes	no	yes	no
440	7	control	no	no	M	38	smoker	no	regular	higher	no	no	no	no
441	7	bronchitis	no	no	M	38	smoker	high	regular	higher	yes	no	no	no
442	7	control	no	no	M	38	non smoker	moderate	obese	higher	yes	no	no	no
443	7	asthma	no	no	M	38	non smoker	moderate	obese	higher	yes	no	yes	no
444	7	control	no	no	M	38	non smoker	high	regular	lower	yes	no	no	no
445	7	control	no	no	M	38	smoker	high	overweight	higher	no	no	no	no
446	7	rhinitis	no	no	M	38	non smoker	no	regular	higher	no	no	no	yes
447	7	control	no	no	M	38	non smoker	no	regular	higher	no	no	no	no
448	7	control	no	no	M	38	non smoker	no	overweight	higher	yes	no	no	no
449	7	rhinitis	no	no	M	38	ex smoker	moderate	regular	higher	no	no	no	no
450	8	rhinitis	no	no	M	38	non smoker	no	regular	higher	no	no	no	no
451	8	asthma	no	no	M	38	non smoker	no	regular	higher	no	no	no	yes
452	8	rhinitis	no	no	M	38	ex smoker	no		higher	yes	no	no	no
453	8	rhinitis	no	no	M	38	non smoker	no	regular	higher	no	no	no	no
454	2	rhinitis	no	no	F	38	non smoker	no	obese	higher	no	no	no	no
455	2	control	yes	no	F	38	non smoker	no	regular	higher	yes	no	no	no
456	2	rhinitis	no	no	F	38	ex smoker	no	obese	lower	yes	yes	no	no
457	11	asthma	no	no	F	38	non smoker	no	regular	lower	no	no	no	no
458	11	bronchitis	no	no	F	38	non smoker	no	regular	higher	yes	no	no	yes
459	11	asthma	no	no	F	38	smoker	no	regular	higher	yes	no	no	no
460	4	asthma	no	no	F	38	non smoker	no	regular	higher	no	no	no	no
461	4	bronchitis	no	no	F	38	non smoker	no	overweight	higher	yes	no	no	no
462	4	bronchitis	no	no	F	38	non smoker	moderate	regular	higher	yes	no	no	no
463	4	bronchitis	no	no	F	38	non smoker	no	regular	higher	yes	no	no	no
464	4	bronchitis	no	no	F	38	non smoker	no	regular	higher	yes	no	no	yes
465	7	rhinitis	yes	no	F	38	ex smoker	no	regular	higher	yes	no	no	no
466	7	control	no	no	F	38	non smoker	no	regular	higher	yes	no	no	no
467	7	control	no	no	F	38	non smoker	moderate	regular	higher	yes	no	no	no
468	7	control	no	no	F	38	smoker	no	overweight	higher	yes	no	no	no
469	7	rhinitis	no	no	F	38	non smoker	no	regular	higher	yes	no	no	no
470	7	rhinitis	no	no	F	38	smoker	moderate	regular	higher	no	no	no	no
471	7	rhinitis	no	no	F	38	non smoker	no	regular	higher	no	no	no	no
472	7	rhinitis	no	no	F	38	non smoker	no	regular	higher	no	no	no	no
473	7	control	no	no	F	38	non smoker	no	regular	higher	yes	no	no	no
474	7	rhinitis	no	no	F	38	ex smoker	no	regular	higher	no	no	no	no
475	7	control	no	no	F	38	non smoker	moderate	regular	higher	yes	no	no	no
476	7	asthma	no	no	F	38	non smoker	no	regular	higher	no	no	no	yes
477	7	rhinitis	no	no	F	38	ex smoker	no	regular	higher	no	no	no	no
478	7	control	no	no	F	38	non smoker	no	regular	higher	no	no	no	no
479	7	rhinitis	yes	no	F	38	non smoker	no	regular	higher	yes	no	no	no
480	7	rhinitis	no	no	F	38	non smoker	no	obese	higher	yes	no	no	no
481	7	rhinitis	no	no	F	38	non smoker	no	regular	higher	no	no	no	yes
482	7	control	no	no	F	38	smoker	moderate	regular	higher	yes	no	no	no
483	7	asthma	no	no	F	38	ex smoker	no	obese	lower	no	no	no	no
484	7	rhinitis	no	no	F	38	non smoker	no	obese	higher	no	no	yes
485	8	control	no	no	F	38	non smoker	no	regular	higher	yes	no	no	no
486	8	rhinitis	no	yes	F	38	non smoker	moderate	overweight	higher	yes	no	yes	no
487	8	rhinitis	no	no	F	38	non smoker	no	overweight	higher	yes	no	no	yes
488	2	rhinitis	no	no	M	39	smoker	no	overweight	lower	no	no	no	yes
489	2	control	no	no	M	39	ex smoker	high	overweight	higher	yes	no	no	yes
490	11	bronchitis	no	no	M	39	non smoker	moderate	regular	higher	yes	no	yes	yes
491	11	rhinitis	no	no	M	39	ex smoker	high	overweight	higher	yes	no	no	no
492	11	asthma	no	no	M	39	ex smoker	no	overweight	higher	yes	no	no	no
493	11	bronchitis	no	no	M	39	non smoker	no	overweight	higher	yes	no	no	no
494	11	control	no	no	M	39	non smoker	no	overweight	lower	yes	no	no	no
495	4	rhinitis	no	no	M	39	ex smoker	no	regular	higher	no	no	no	no
496	4	rhinitis	no	no	M	39	smoker	high		higher	yes	no	no	yes
497	4	asthma	no	no	M	39	ex smoker	no	regular	higher	yes	no	no	no
498	7	asthma	no	no	M	39	non smoker	no	regular	higher	no	no	no	no
499	7	control	no	no	M	39	ex smoker	high	overweight	higher	no	no	no	no
500	7	rhinitis	no	no	M	39	smoker	moderate	regular	higher	no	no	no	no
501	7	control	no	no	M	39	non smoker	no	regular	higher	no	no	no	yes
502	7	control	no	no	M	39	non smoker	no	regular	higher	no	no	no	no
503	7	rhinitis	no	no	M	39	non smoker	no	overweight	higher	yes	no	no	no
504	7	bronchitis	no	no	M	39	smoker	moderate	regular	higher	yes	no	no	yes
505	7	control	yes	no	M	39	non smoker	no	regular	higher	no	no	no	yes
506	7	asthma	no	no	M	39	smoker	high	overweight	higher	no	no	no	no
507	7	control	no	no	M	39	non smoker		overweight	higher	no	no	no	no
508	7	control	no	no	M	39	ex smoker	no	overweight	higher	no	no	no	no
509	7	asthma	no	no	M	39	non smoker	no	overweight	higher	no	no	yes	no
510	7	asthma	no	no	M	39	smoker	high	overweight	higher	no	no	no	no
511	7	rhinitis	no	no	M	39	smoker	moderate	regular	higher	no	no	yes	no
512	7	bronchitis	no	no	M	39	smoker	high	obese	lower	yes	no	no	no
513	8	asthma	no	no	M	39	ex smoker	no		higher	no	no	no	yes
514	8	rhinitis	no	no	M	39	smoker	high	overweight	higher	yes	no	yes	no
515	8	rhinitis	no	no	M	39	non smoker	no	overweight	higher	no	no	no	yes
516	8	rhinitis	no	no	M	39	non smoker	moderate	regular	higher	no	no	no	no
517	2	rhinitis	no	no	F	39	non smoker	moderate	regular	higher	no	no	no	no
518	2	rhinitis	no	no	F	39	non smoker	no	regular	higher	yes	no	no	no
519	11	bronchitis	no	yes	F	39	non smoker	no	obese	lower	yes	no	yes	yes
520	11	rhinitis	no	no	F	39	non smoker	moderate	regular	higher	yes	no	no	yes
521	11	bronchitis	no	no	F	39	non smoker	no	obese	higher	no	no	no	yes
522	11	asthma	no	no	F	39	ex smoker	moderate	regular	higher	no	no	no	no
523	11	rhinitis	no	no	F	39	non smoker	no	regular	higher	yes	no	no	no
524	11	bronchitis	no	no	F	39	non smoker	no	regular	higher	yes	no	no	no
525	11	rhinitis	no	no	F	39	ex smoker	no	overweight	higher	yes	no	no	no
526	11	rhinitis	no	no	F	39	smoker	no	regular	higher	yes	no	no	no
527	4	rhinitis	no	no	F	39	non smoker	moderate	regular	higher	yes	no	no	no
528	4	asthma	no	no	F	39	smoker	moderate	regular	higher	yes	no	no	no
529	4	control	no	no	F	39	non smoker	no	obese	higher	no	no	yes	yes
530	7	control	no	no	F	39	non smoker	no	obese	higher	no	no	no	yes
531	7	rhinitis	no	no	F	39	smoker	moderate	regular	higher	no	no	no	no
532	7	control	no	no	F	39	non smoker	no	regular	higher	yes	no	no	no
533	7	control	no	no	F	39	ex smoker	no	regular	higher	no	no	no	yes
534	7	control	no	no	F	39	ex smoker	no	regular	higher	yes	no	no	no
535	7	rhinitis	no	no	F	39	smoker	no	overweight	higher	no	no	no	no
536	7	bronchitis	no	no	F	39	ex smoker	no	regular	higher	no	no	no	no
537	7	control	no	no	F	39	non smoker	no	regular	higher	yes	no	no	no
538	7	rhinitis	no	no	F	39	non smoker	moderate	obese	higher	yes	no	no	yes
539	7	rhinitis	no	no	F	39	non smoker	no	regular	higher	no	no	no	no
540	7	asthma	no	no	F	39	non smoker	moderate	overweight	higher	no	no	no	no
541	7	control	no	no	F	39	non smoker	no	overweight	higher	yes	no	no	no
542	7	asthma	no	no	F	39	ex smoker	no	regular	higher	yes	no	no	no
543	7	rhinitis	no	no	F	39	non smoker	no	regular	higher	no	no	no	no
544	7	rhinitis	no	no	F	39	non smoker	no	overweight	higher	yes	no	no	no
545	7	control	no	no	F	39	non smoker	no	overweight	higher	no	no	no	no
546	7	asthma	no	no	F	39	smoker	moderate	regular	higher	yes	no	no	no
547	7	control	no	no	F	39	non smoker	no	overweight	higher	no	no	no	no
548	7	rhinitis	no	no	F	39	non smoker	no	regular	higher	yes	no	no	no
549	7	control	yes	no	F	39	non smoker	no	regular	higher	yes	no	no	no
550	7	control	no	no	F	39	non smoker	no	regular	higher	yes	no	no	no
551	8	rhinitis	no	no	F	39	smoker	moderate	overweight	higher	yes	no	no	no
552	8	asthma	no	no	F	39	non smoker	no	regular	higher	no	no	no	no
553	2	rhinitis	yes	no	M	40	ex smoker	no	overweight	higher	yes	no	no	yes
554	11	rhinitis	no	no	M	40	non smoker	no		higher	yes	no	no	no
555	11	asthma	no	no	M	40	non smoker	no	obese	higher	yes	no	yes	no
556	11	control	no	no	M	40	ex smoker	no	regular	higher	yes	no	no	yes
557	11	asthma	no	no	M	40	non smoker	no	obese	higher	no	no	no	yes
558	11	asthma	no	no	M	40	smoker	no	regular	higher	yes	no	no	no
559	4	control	no	no	M	40	non smoker	no	overweight	higher	no	no	no	yes
560	4	control	no	no	M	40	non smoker	no	regular	higher	no	no	no	no
561	4	bronchitis	no	no	M	40	smoker	no	regular	lower	no	no	no	no
562	4	asthma	no	no	M	40	non smoker	no	regular	higher	no	no	no	no
563	7	asthma	no	no	M	40	ex smoker	high	overweight	higher	yes	no	no	no
564	7	control	no	no	M	40	non smoker	no	regular	higher	yes	no	no	no
565	7	rhinitis	no	no	M	40	non smoker	moderate	overweight	higher	no	no	no	no
566	7	bronchitis	no	no	M	40	non smoker	no	overweight	higher	no	no	no	no
567	7	rhinitis	yes	no	M	40	non smoker	no	overweight	higher	no	no	no	no
568	7	control	no	no	M	40	smoker	high	regular	higher	no	no	yes	no
569	7	control	no	no	M	40	non smoker	high	overweight	lower	yes	no	no	no
570	7	control	no	no	M	40	smoker	moderate	regular	higher	yes	no	no	no
571	7	control	no	no	M	40	smoker	no	regular	lower	yes	no	no	no
572	7	rhinitis	no	no	M	40	non smoker	no	regular	higher	no	no	no	no
573	7	rhinitis	no	no	M	40	ex smoker	moderate	regular	higher	no	no	no	no
574	7	rhinitis	no	no	M	40	non smoker	no	overweight	higher	no	no	no	no
575	7	rhinitis	no	no	M	40	non smoker	no	regular	lower		no	no	no
576	7	asthma	no	no	M	40	ex smoker	high	regular	higher	no	no	no	no
577	2	rhinitis	no	no	F	40	smoker	high	regular	higher	yes	no	no	no
578	2	control	no	no	F	40	non smoker	no	regular	higher	yes	no	no	no
579	2	bronchitis	no	no	F	40	non smoker	no	regular	higher	yes	no	no	no
580	2	rhinitis	no	no	F	40	ex smoker	no	overweight	higher	yes	no	no	yes
581	11	rhinitis	no	no	F	40	non smoker	no	regular	higher	no	no	no	yes
582	11	asthma	no	no	F	40	non smoker	no	regular	higher	yes	no	no	no
583	11	rhinitis	no	no	F	40	ex smoker	no	regular	higher	yes	no	no	no
584	11	rhinitis	no	no	F	40	smoker	no	regular	higher	yes	no	no	no
585	11	control	no	no	F	40	non smoker	no	regular	higher	yes	no	no	no
586	4	asthma	no	no	F	40	non smoker	no	regular	higher	yes	no	no	no
587	4	asthma	no	no	F	40	non smoker	no	overweight	higher	no	no	no	no
588	4	rhinitis	no	no	F	40	non smoker	no	obese	higher	yes	no	no	no
589	4	rhinitis	no	no	F	40	non smoker	no	regular	higher	no	no	no	no
590	7	rhinitis	yes	no	F	40	ex smoker	no	regular	higher	no	no	no	no
591	7	rhinitis	no	no	F	40	non smoker	no	regular	higher	no	no	no	no
592	7	rhinitis	no	no	F	40	non smoker	no	regular	higher	yes	no	no	no
593	7	control	no	no	F	40	non smoker	no	regular	higher	yes	no	no	no
594	7	bronchitis	no	no	F	40	non smoker	no	obese	higher	no	no	no	no
595	7	control	no	no	F	40	non smoker	no	regular	higher	yes	no	no	no
596	7	rhinitis	no	no	F	40	non smoker	no	regular	higher	no	no	no	no
597	7	asthma	no	no	F	40	non smoker	no	regular	higher	no	no	no	no
598	7	asthma	no	no	F	40	smoker	no	obese	higher	no	no	no	no
599	7	rhinitis	no	no	F	40	smoker	no	regular	higher	no	no	no	no
600	7	asthma	no	no	F	40	non smoker	no	regular	higher	yes	no	no	no
601	7	control	no	no	F	40	non smoker	no	obese	higher	yes	no	no	no
602	7	asthma	no	no	F	40	non smoker	no	regular	higher	no	no	no	yes
603	7	rhinitis	no	no	F	40	smoker	no	regular	higher	yes	no	no	no
604	7	control	no	no	F	40	non smoker	no	regular	higher	yes	no	no	no
605	7	rhinitis	no	no	F	40	non smoker	no	overweight	higher	yes	no	no	no
606	7	rhinitis	yes	no	F	40	non smoker	no	regular	higher	yes	no	no	no
607	8	rhinitis	no	no	F	40	non smoker	no	regular	higher	no	no	no	no
608	8	rhinitis	no	no	F	40	ex smoker	no	regular	higher	yes	no	no	no
609	8	rhinitis	no	no	F	40	non smoker	high	regular	higher	yes	no	no	no
610	8	rhinitis	no	no	F	40	non smoker	no		higher	yes	no	no	no
611	6	rhinitis	no	no	M	41	smoker	high	regular	higher	yes	no	no	no
612	2	rhinitis	no	no	M	41	non smoker	no	overweight	higher	no	no	no	no
613	2	control	yes	no	M	41	non smoker	no	regular	lower	yes	no	no	no
614	11	rhinitis	no	no	M	41	ex smoker	moderate	regular	higher	yes	no	no	yes
615	11	rhinitis	no	no	M	41	ex smoker	no	regular	higher	yes	no	no	no
616	4	rhinitis	no	no	M	41	smoker	moderate	regular	higher	no	no	no	yes
617	4	asthma	no	no	M	41	non smoker	moderate	regular	higher	yes	no	no	no
618	4	bronchitis	no	yes	M	41	smoker	no	obese	lower	yes	no	no	yes
619	4	rhinitis	no	no	M	41	non smoker	no		higher	no	no	no	no
620	4	rhinitis	no	no	M	41	ex smoker	no	regular	higher	no	no	no	no
621	7	control	no	no	M	41	non smoker	moderate	regular	higher	yes	no	no	no
622	7	asthma	no	no	M	41	smoker	high	overweight	higher	yes	no	no	no
623	7	asthma	no	no	M	41	smoker	high	overweight	lower	no	no	yes	no
624	7	asthma	no	no	M	41	smoker	moderate	regular	higher	no	no	no	no
625	7	control	no	no	M	41	ex smoker	moderate	overweight	higher	no	no	no	yes
626	7	rhinitis	no	no	M	41	ex smoker	no	overweight	higher	no	no	yes	no
627	7	rhinitis	no	no	M	41	non smoker	no	overweight	higher	yes	no	no	no
628	7	control	no	no	M	41	non smoker	moderate	regular	higher	no	no	no	no
629	7	rhinitis	no	no	M	41	non smoker	no	regular	higher	no	no	no	no
630	7	control	no	no	M	41	non smoker	moderate	overweight	higher	yes	no	yes	no
631	7	control	no	no	M	41	non smoker	no	overweight	higher	no	no	no	no
632	7	control	no	no	M	41	smoker	high	overweight	lower	yes	no	no	no
633	7	asthma	no	no	M	41	smoker	moderate	overweight	lower	yes	no	no	no
634	7	rhinitis	no	no	M	41	non smoker	no	overweight	higher	no	no	no	no
635	7	asthma	no	no	M	41	non smoker	no	overweight	higher	yes	no	no	yes
636	7	bronchitis	no	no	M	41	ex smoker	no	overweight	higher	yes	no	yes	no
637	8	rhinitis	no	no	M	41	ex smoker	high		higher	yes	no	no	no
638	8	rhinitis	no	no	M	41	ex smoker	moderate	regular	higher	no	no	no	no
639	8	rhinitis	no	no	M	41	non smoker	no		higher	no	no	no	yes
640	8	asthma	no	no	M	41	non smoker	high	regular	higher	yes	no	no	no
641	6	rhinitis	no	yes	F	41	non smoker	no	obese	higher	yes	no	no	no
642	2	asthma	yes	yes	F	41	ex smoker	no	regular	higher	yes	no	no	yes
643	2	rhinitis	no	no	F	41	ex smoker	no	overweight	lower	yes	no	no	no
644	2	rhinitis	no	no	F	41	non smoker	no	regular	higher	no	no	no	yes
645	2	control	no	no	F	41	ex smoker	no	regular	higher	yes	no	no	yes
646	2	rhinitis	no	no	F	41	non smoker	no	regular	lower	no	no	no	no
647	2	bronchitis	no	no	F	41	ex smoker	high	regular	higher	no	no	no	yes
648	11	rhinitis	no	no	F	41	non smoker	no	regular	higher	no	no	no	no
649	11	rhinitis	no	no	F	41	ex smoker		regular	higher	yes	no	no	yes
650	4	rhinitis	no	no	F	41	non smoker	no	regular	higher	yes	no	no	no
651	7	control	no	no	F	41	ex smoker	no	regular	lower	yes	no	no	yes
652	7	rhinitis	yes	no	F	41	non smoker	moderate	regular	higher	yes	no	no	no
653	7	control	no	no	F	41	non smoker	no	regular	higher	yes	no	no	no
654	7	bronchitis	no	no	F	41	non smoker	moderate	regular	higher	no	no	no	yes
655	7	control	yes	no	F	41	ex smoker	moderate	regular	higher	no	no	no	no
656	7	rhinitis	no	no	F	41	ex smoker	no	regular	higher	no	no	no	yes
657	7	control	yes	no	F	41	ex smoker	no	regular	lower	yes	no	no	yes
658	7	bronchitis	no	no	F	41	non smoker	no	overweight	higher	no	no	no	no
659	7	control	no	no	F	41	non smoker	no	obese	higher	yes	no	no	no
660	7	rhinitis	no	no	F	41	non smoker	no	regular	higher	no	no	no	no
661	7	bronchitis	no	no	F	41	non smoker	no	obese	higher	yes	no	yes	no
662	7	rhinitis	no	no	F	41	non smoker	no	regular	higher	no	no	no	no
663	7	asthma	no	no	F	41	ex smoker	no	regular	higher	no	no	no	no
664	7	bronchitis	no	no	F	41	non smoker	no	regular	higher	no	no	no	no
665	7	asthma	no	no	F	41	non smoker	no	regular	higher	no	no	no	no
666	7	asthma	yes	no	F	41	non smoker	no	obese	higher	yes	no	yes	yes
667	7	rhinitis	no	no	F	41	ex smoker	no	overweight	higher	no	no	no	yes
668	7	rhinitis	no	no	F	41	non smoker	moderate	regular	higher	no	no	no	no
669	7	control	no	no	F	41	non smoker	moderate	regular	higher	no	no	no	yes
670	7	rhinitis	no	no	F	41	smoker	moderate	regular	higher	yes	no	no	no
671	7	control	yes	no	F	41	non smoker	no	obese	higher	no	no	yes	no
672	7	rhinitis	no	no	F	41	ex smoker	moderate	regular	higher	yes	yes	no	yes
673	7	bronchitis	no	no	F	41	smoker	moderate	regular	higher	no	no	no	no
674	7	asthma	no	no	F	41	non smoker	no	regular	higher	yes	no	no	no
675	7	control	no	no	F	41	smoker	no	regular	higher	no	no	no	no
676	7	control	no	no	F	41	smoker	no	regular	higher	yes	no	no	no
677	7	control	no	no	F	41	smoker	no	regular	higher	no	no	no	no
678	8	control	no	no	F	41	ex smoker	moderate	overweight	higher	yes	no	no	no
679	8	asthma	yes	no	F	41	non smoker	no	regular	higher	yes	no	no	no
680	8	asthma	yes	no	F	41	smoker	no	regular	higher	yes	no	no	yes
681	6	control	no	no	M	42	smoker	high	obese	higher	yes	no	no	no
682	11	asthma	no	yes	M	42	non smoker	moderate	obese		no	no	no	no
683	11	asthma	no	no	M	42	non smoker	no	regular	higher	no	no	no	no
684	11	asthma	no	no	M	42	non smoker	moderate	obese	higher	yes	no	no	no
685	11	bronchitis	no	no	M	42	non smoker	moderate	regular	higher	no	no	no	no
686	11	rhinitis	no	no	M	42	smoker	high	regular	higher	yes	no	no	yes
687	11	rhinitis	no	no	M	42	non smoker	no	regular	higher	no	no	no	no
688	4	asthma	no	no	M	42	ex smoker	no	overweight	higher	no	no	yes	yes
689	4	control	no	no	M	42	smoker	no	overweight	higher	yes	no	no	no
690	4	rhinitis	no	no	M	42	ex smoker	moderate	regular	higher	no	no	no	no
691	4	rhinitis	no	no	M	42	smoker	no	overweight	higher	no	no	no	no
692	4	rhinitis	no	no	M	42	non smoker	no	regular	higher	no	no	no	no
693	4	rhinitis	no	no	M	42	non smoker	no	regular	higher	yes	no	no	no
694	7	bronchitis	no	no	M	42	ex smoker	moderate	regular	lower	no	no	no	yes
695	7	rhinitis	no	yes	M	42	smoker	no	obese	lower	yes	no	no	yes
696	7	rhinitis	no	no	M	42	smoker	no	regular	higher	no	no	no	no
697	7	rhinitis	no	no	M	42	smoker	moderate	regular	lower	yes	no	no	no
698	7	rhinitis	no	no	M	42	ex smoker	high	regular	higher	no	no	no	yes
699	7	rhinitis	no	no	M	42	smoker	no	overweight	lower	no	no	no	yes
700	7	control	yes	no	M	42	non smoker	no	regular	lower	no	no	no	no
701	7	control	no	no	M	42	non smoker	no	regular	higher	no	no	no	no
702	7	rhinitis	no	no	M	42	ex smoker	moderate	overweight	higher	no	no	yes	no
703	7	rhinitis	no	no	M	42	ex smoker	moderate	obese	higher	yes	no	no	no
704	7	control	no	no	M	42	non smoker	no	overweight	higher	no	no	no	yes
705	7	control	no	no	M	42	ex smoker	moderate	overweight	higher	no	no	no	no
706	7	control	no	no	M	42	non smoker	moderate	regular	higher	no	no	no	no
707	7	rhinitis	no	no	M	42	non smoker	no	overweight	higher	no	no	no	no
708	7	asthma	no	no	M	42	non smoker	no	obese	higher	yes	no	no	no
709	7	control	no	no	M	42	smoker	no	regular	higher	no	no	no	no
710	7	rhinitis	no	no	M	42	smoker	moderate	overweight	higher	no	no	no	yes
711	7	control	no	no	M	42	ex smoker	high	overweight	higher	yes	no	yes	yes
712	7	asthma	no	no	M	42	ex smoker	moderate	regular	higher	no	no	no	no
713	7	asthma	no	no	M	42	non smoker	no	regular	higher	no	no	no	no
714	7	control	no	no	M	42	non smoker	moderate	overweight	higher	yes	no	no	no
715	7	bronchitis	no	no	M	42	non smoker	high	regular	higher	no	no	no	no
716	7	asthma	no	no	M	42	non smoker	no	regular	higher	no	no	no	no
717	7	control	no	no	M	42	ex smoker	moderate	obese	higher	yes	no	no	yes
718	7	asthma	no	no	M	42	smoker	moderate	overweight	higher	yes	no	no	no
719	7	control	no	no	M	42	non smoker	no	regular	higher	no	no	no	no
720	7	bronchitis	no	no	M	42	non smoker	no	overweight	lower	yes	no	no	no
721	8	rhinitis	no	no	M	42	smoker	no	regular	higher	yes	yes	no	no
722	8	asthma	no	no	M	42	non smoker	no	obese	higher	yes	no	yes	yes
723	8	rhinitis	yes	no	M	42	non smoker	no	regular	higher	no	no	no	no
724	8	rhinitis	no	no	M	42	non smoker	no	overweight	higher	no	no	yes	no
725	6	control	no	no	F	42	smoker	no	obese	higher	no	no	no	yes
726	6	rhinitis	no	yes	F	42	smoker	no	regular	higher	yes	no	no	no
727	2	control	no	no	F	42	ex smoker	high	obese	higher	yes	no	no	no
728	2	bronchitis	no	no	F	42	non smoker	no	regular	lower	no	no	yes	no
729	2	asthma	no	no	F	42	smoker	no	regular	higher	yes	no	no	yes
730	11	bronchitis	no	no	F	42	smoker	no	regular	higher	yes	no	yes	no
731	11	control	no	no	F	42	non smoker	no	regular	higher	no	no	no	no
732	11	asthma	yes	no	F	42	smoker	moderate	regular	higher	no	no	yes	no
733	11	control	no	no	F	42	non smoker	no	regular	higher	yes	no	no	no
734	11	bronchitis	no	no	F	42	non smoker	high	regular	higher	yes	no	no	yes
735	11	rhinitis	no	no	F	42	ex smoker	no	regular	higher	no	no	no	no
736	11	bronchitis	no	no	F	42	non smoker	no	regular	higher	yes	no	no	yes
737	11	rhinitis	no	no	F	42	non smoker	no	regular	higher	no	no	no	no
738	11	asthma	no	no	F	42	ex smoker	moderate	regular	higher	yes	no	no	no
739	4	control	no	no	F	42	ex smoker	moderate	regular	lower	yes	no	no	no
740	4	bronchitis	no	no	F	42	smoker	no		higher	yes	no	no	no
741	4	rhinitis	no	no	F	42	non smoker	moderate	overweight	higher	no	no	no	no
742	4	bronchitis	no	no	F	42	non smoker	no		higher	no	no	no	no
743	4	rhinitis	no	no	F	42	ex smoker	moderate	overweight	higher	yes	no	no	no
744	4	asthma	no	no	F	42	smoker	moderate	regular	higher	no	no	no	no
745	7	rhinitis	no	no	F	42	non smoker	no	regular	higher	yes	no	no	no
746	7	bronchitis	yes	no	F	42	non smoker	no	regular	higher	no	no	no	no
747	7	rhinitis	no	no	F	42	non smoker	no	regular	higher	yes	no	no	no
748	7	rhinitis	no	no	F	42	non smoker	moderate	overweight	higher	yes	no	yes	yes
749	7	control	no	no	F	42	non smoker	no	regular	higher	yes	no	yes	no
750	7	asthma	no	no	F	42	non smoker	no	overweight	lower	no	no	no	no
751	7	asthma	no	yes	F	42	non smoker	moderate	overweight	higher	yes	no	no	no
752	7	control	no	no	F	42	ex smoker	moderate	regular	lower	no	no	no	no
753	7	asthma	no	no	F	42	ex smoker	no	regular	higher	no	no	no	no
754	7	control	no	no	F	42	smoker		regular	higher	yes	no	no	no
755	7	control	no	no	F	42	non smoker	no	regular	higher	yes	no	no	no
756	7	asthma	no	no	F	42	non smoker	high	regular	higher	yes	no	no	no
757	7	bronchitis	no	no	F	42	non smoker	no	obese	lower	yes	no	no	no
758	7	control	no	no	F	42	non smoker	high	regular	higher	no	no	no	no
759	7	control	yes	no	F	42	non smoker	no	regular	higher	no	no	no	no
760	7	asthma	no	no	F	42	non smoker	no	regular	higher	yes	no	no	no
761	7	control	no	no	F	42	non smoker	no	regular	higher	no	no	no	no
762	7	rhinitis	no	no	F	42	non smoker	moderate	overweight	higher	yes	no	no	no
763	7	asthma	no	no	F	42	smoker	no	regular	lower	yes	no	no	no
764	7	rhinitis	no	no	F	42	non smoker	no	obese	higher	no	no	no	yes
765	7	bronchitis	no	no	F	42	non smoker	no	regular	higher	no	no	no	no
766	8	asthma	no	no	F	42	non smoker	no		lower	yes	no	no	no
767	8	rhinitis	no	no	F	42	smoker	moderate	overweight	higher	yes	no	yes	no
768	8	control	no	no	F	42	smoker	no	regular	higher	yes	no	no	no
769	8	rhinitis	no	no	F	42	non smoker	no	regular	higher	yes	no	no	no
770	8	asthma	no	no	F	42	non smoker	no	regular	higher	no	no	no	no
771	1	rhinitis	no	no	M	43	non smoker	no	regular	higher	no	no	no	no
772	1	control	no	no	M	43	smoker	no	regular	lower	yes	no	no	no
773	6	asthma	no	no	M	43	non smoker	moderate	regular	higher	no	no	no	no
774	2	asthma	no	no	M	43	ex smoker	moderate	overweight	higher	no	no	no	yes
775	11	rhinitis	no	no	M	43	smoker	moderate	regular	higher	no	no	no	no
776	11	asthma	no	no	M	43	ex smoker	moderate	overweight	higher	yes	no	no	no
777	11	control	no	no	M	43	non smoker	no	regular	higher	yes	no	no	yes
778	11	bronchitis	no	no	M	43	smoker	no	regular	higher	yes	no	no	no
779	4	rhinitis	no	no	M	43	ex smoker	moderate	overweight	higher	yes	no	no	no
780	4	rhinitis	no	no	M	43	smoker	no	obese	higher	yes	no	yes	no
781	4	control	no	no	M	43	smoker	moderate	overweight	higher	yes	no	no	no
782	4	control	no	no	M	43	non smoker	high	obese	higher	no	no	no	yes
783	4	rhinitis	no	no	M	43	smoker	moderate	regular	higher	no	no	no	no
784	4	asthma	no	no	M	43	non smoker			higher	no	no	no	yes
785	7	bronchitis	no	no	M	43	smoker	no	regular	lower	yes	no	no	no
786	7	control	no	no	M	43	non smoker	high	regular	higher	no	no	no	no
787	7	control	no	no	M	43	ex smoker	moderate	obese	lower	no	no	no	yes
788	7	rhinitis	no	no	M	43	ex smoker	high	regular	lower	no	no	no	no
789	7	rhinitis	no	no	M	43	smoker	high	overweight	lower	yes	no	no	no
790	7	control	no	no	M	43	smoker	moderate	regular	higher	no	no	no	no
791	7	control	no	no	M	43	non smoker	no	regular	higher	no	no	no	no
792	7	control	no	no	M	43	ex smoker	moderate	overweight	higher	no	no	no	no
793	7	asthma	no	no	M	43	non smoker	no	regular	higher	yes	no	no	no
794	7	control	no	no	M	43	non smoker	moderate	overweight	higher	yes	no	yes	no
795	7	control	no	no	M	43	ex smoker	no	obese	higher	yes	no	no	yes
796	7	rhinitis	no	no	M	43	non smoker	moderate	overweight	higher	yes	no	no	no
797	7	rhinitis	no	no	M	43	smoker	high	regular	higher	yes	no	no	no
798	7	asthma	no	no	M	43	ex smoker	high	overweight	higher	yes	no	no	yes
799	7	control	no	no	M	43	non smoker	no	regular	higher	no	no	no	no
800	7	bronchitis	yes	no	M	43	non smoker	moderate	regular	lower	yes	no	no	no
801	7	control	no	no	M	43	ex smoker	moderate	overweight	higher	no	no	yes	no
802	7	rhinitis	no	no	M	43	ex smoker	no	regular	higher	no	no	no	no
803	8	rhinitis	no	no	M	43	smoker	no	regular	higher	yes	no	no	no
804	8	control	no	no	M	43	non smoker	no	obese	higher	no	no	no	no
805	8	asthma	no	no	M	43	ex smoker	high	regular	higher	yes	no	no	no
806	8	rhinitis	no	no	M	43	non smoker	no	regular	higher	no	no	no	no
807	6	bronchitis	no	no	F	43	non smoker	no	regular	higher	yes	no	no	no
808	6	control	no	no	F	43	non smoker	no	overweight	higher	yes	no	no	no
809	6	rhinitis	no	yes	F	43	non smoker	no	regular	higher	no	no	no	no
810	2	rhinitis	yes	no	F	43	non smoker	no	regular	higher	no	no	no	no
811	2	bronchitis	no	yes	F	43	smoker	no	regular	higher	yes	no	no	yes
812	2	rhinitis	no	no	F	43	ex smoker	no	regular	lower	no	no	no	no
813	11	rhinitis	no	no	F	43	non smoker	no	regular	higher	yes	no	no	no
814	11	control	no	no	F	43	non smoker	no	regular	higher	yes	no	no	no
815	11	control	no	no	F	43	smoker	moderate	regular	higher	yes	no	no	yes
816	11	rhinitis	no	no	F	43	ex smoker	no	regular	higher	no	no	no	no
817	11	asthma	no	yes	F	43	ex smoker	no	regular	higher	yes	no	no	no
818	11	asthma	no	no	F	43	ex smoker	no	overweight	higher	yes	no	no	no
819	11	bronchitis	yes	yes	F	43	non smoker	no	regular	higher	yes	no	no	no
820	4	rhinitis	no	no	F	43	non smoker	no	regular	higher	yes	no	no	yes
821	4	asthma	no	no	F	43	smoker	no	regular	lower	yes	no	no	no
822	4	rhinitis	no	yes	F	43	smoker	no	overweight		yes	no	no	no
823	4	bronchitis	no	no	F	43	non smoker	no	regular	higher	yes	no	no	no
824	4	asthma	no	no	F	43	non smoker	no	regular	higher	no	no	no	no
825	7	control	no	no	F	43	smoker	no	regular	lower	yes	no	no	no
826	7	asthma	yes	no	F	43	smoker	no	regular	higher	yes	no	no	no
827	7	control	no	no	F	43	non smoker	moderate	overweight	higher	yes	no	no	no
828	7	control	no	no	F	43	smoker	no	obese	higher	yes	no	no	no
829	7	control	no	no	F	43	non smoker	no	overweight	higher	yes	no	no	no
830	7	rhinitis	no	no	F	43	non smoker	no	regular	higher	no	no	no	no
831	7	rhinitis	no	yes	F	43	smoker	no	regular	higher	yes	no	no	no
832	7	control	no	no	F	43	non smoker	no	regular	higher	no	no	no	no
833	7	rhinitis	no	no	F	43	smoker	high	regular	higher	yes	no	no	no
834	7	control	no	no	F	43	smoker	no	regular	lower	no	no	no	no
835	7	control	no	no	F	43	non smoker	no	regular	higher	yes	no	no	no
836	7	rhinitis	yes	yes	F	43	smoker	no	regular	lower	yes	no	no	no
837	7	asthma	no	no	F	43	non smoker	no	overweight	lower	no	no	no	no
838	7	rhinitis	no	no	F	43	ex smoker	no	overweight	lower	yes	no	no	yes
839	7	rhinitis	no	no	F	43	smoker	no	obese	lower	no	no	no	no
840	7	control	no	no	F	43	non smoker	no	overweight	higher	no	no	no	no
841	7	rhinitis	no	no	F	43	ex smoker	no	regular	higher	yes	no	no	no
842	7	bronchitis	no	no	F	43	non smoker	high	regular	lower	yes	no	yes	no
843	7	rhinitis	no	no	F	43	smoker	moderate	regular	higher	yes	no	no	no
844	7	control	no	no	F	43	non smoker	no	regular	lower	no	no	no	yes
845	7	control	no	no	F	43	ex smoker	no	regular	higher	no	no	no	no
846	7	control	no	no	F	43	non smoker	moderate	overweight	higher	yes	no	no	yes
847	7	asthma	no	no	F	43	non smoker	high	obese	higher	no	no	no	yes
848	7	bronchitis	no	no	F	43	non smoker	moderate	regular	higher	yes	no	no	no
849	7	rhinitis	no	no	F	43	ex smoker	high	regular	lower	no	no	no	no
850	7	asthma	no	no	F	43	non smoker	moderate	regular	higher	no	no	no	no
851	8	asthma	no	no	F	43	smoker	no	overweight	higher	yes	no	no	yes
852	8	asthma	no	no	F	43	non smoker	no	regular	higher	no	no	no	no
853	1	rhinitis	no	no	M	44	non smoker	high	regular	higher	no	no	no	no
854	6	rhinitis	no	no	M	44	non smoker	no	regular	higher	no	no	no	no
855	6	rhinitis	no	no	M	44	non smoker	moderate	overweight	higher	no	no	no	yes
856	6	bronchitis	no	no	M	44	ex smoker	no	overweight	higher	no	no	no	yes
857	2	control	no	no	M	44	non smoker	high	regular	higher	yes	no	no	no
858	11	control	no	no	M	44	non smoker	no	obese	higher	yes	no	no	yes
859	11	control	no	no	M	44	ex smoker	high	regular	higher	yes	no	no	no
860	11	rhinitis	no	no	M	44	ex smoker	high	overweight	higher	no	no	no	no
861	4	control	no	no	M	44	non smoker	moderate	regular	higher	no	no	no	no
862	4	rhinitis	no	no	M	44	ex smoker	moderate	regular	higher	no	no	no	no
863	4	asthma	no	no	M	44	non smoker	no	obese	higher	no	no	no	no
864	4	asthma	no	no	M	44	smoker	moderate	overweight	higher	yes	no	no	no
865	4	asthma	no	no	M	44	ex smoker	moderate	regular	higher	no	no	no	no
866	4	rhinitis	no	no	M	44	non smoker	no	overweight	higher	no	no	no	no
867	4	rhinitis	no	no	M	44	non smoker	no	regular	lower	yes	no	no	no
868	7	rhinitis	no	no	M	44	non smoker	no	regular	higher	no	no	no	no
869	7	control	no	no	M	44	non smoker	moderate	regular	higher	no	no	no	no
870	7	control	no	no	M	44	ex smoker	high	overweight	higher	no	no	no	yes
871	7	rhinitis	yes	no	M	44	non smoker	no	regular	higher	no	no	no	no
872	7	control	no	no	M	44	non smoker	high	regular	higher	no	no	no	no
873	7	control	no	no	M	44	non smoker	no	regular	higher	no	no	no	no
874	7	rhinitis	no	no	M	44	non smoker	moderate	overweight	higher	no	no	no	no
875	7	rhinitis	no	no	M	44	smoker	high	overweight	higher	yes	no	no	no
876	7	rhinitis	no	no	M	44	ex smoker	high	overweight	higher	yes	no	yes	yes
877	7	rhinitis	no	no	M	44	smoker	moderate		higher	yes	no	no	yes
878	7	asthma	no	no	M	44	smoker	moderate	overweight	higher	no	no	no	yes
879	7	bronchitis	yes	no	M	44	ex smoker	moderate	overweight	lower	no	no	no	no
880	7	bronchitis	no	no	M	44	ex smoker	high	obese	higher	yes	no	no	yes
881	7	rhinitis	no	no	M	44	non smoker	no	overweight	higher	no	no	no	yes
882	7	asthma	no	no	M	44	non smoker	no	regular	higher	no	no	no	no
883	7	rhinitis	no	yes	M	44	ex smoker	moderate	overweight	higher	no	no	no	no
884	8	control	no	no	M	44	non smoker	no	regular	higher	yes	no	no	yes
885	8	asthma	no	no	M	44	non smoker	no	overweight	lower	yes	no	no	no
886	8	rhinitis	no	no	M	44	ex smoker	no		higher	yes	no	no	no
887	3	asthma	no	no	F	44	ex smoker	no	regular	higher	yes	no	no	yes
888	3	rhinitis	no	no	F	44	ex smoker	no	regular	higher	no	no		yes
889	3	asthma	no	no	F	44	non smoker	moderate	overweight	higher	yes	no	no	no
890	6	control	no	no	F	44	non smoker	no	regular	higher	no	no	yes	yes
891	2	rhinitis	no	no	F	44	non smoker	no	regular	higher	yes	no	no	no
892	2	rhinitis	no	no	F	44	ex smoker	no	overweight	lower	no	no	no	no
893	2	rhinitis	no	no	F	44	non smoker	no	obese	higher	yes	no	no	no
894	2	rhinitis	no	no	F	44	smoker	high	regular	higher	yes	no	no	no
895	2	asthma	no	no	F	44	non smoker	no	regular	lower	yes	no	no	no
896	2	rhinitis	no	no	F	44	smoker	no	regular	higher	yes	no	no	yes
897	11	bronchitis	no	no	F	44	non smoker	no	obese	higher	yes	no	no	no
898	11	asthma	no	no	F	44	smoker	high	overweight	higher	yes	no	no	no
899	11	bronchitis	yes	no	F	44	non smoker	no	regular	higher	yes	no	no	no
900	11	bronchitis	no	yes	F	44	non smoker	no	regular	higher	yes	no	no	no
901	11	control	no	no	F	44	smoker	no	regular	higher	no	no	yes	yes
902	4	bronchitis	no	no	F	44	ex smoker	no	obese	higher	yes	no	no	yes
903	4	bronchitis	no	no	F	44	non smoker	no	overweight	higher	yes	no	no	no
904	4	bronchitis	no	no	F	44	ex smoker	moderate	regular	higher	yes	no	no	no
905	7	rhinitis	no	no	F	44	non smoker	no	regular	higher	yes	no	no	no
906	7	control	no	no	F	44	non smoker	no	overweight	higher	yes	no	no	yes
907	7	bronchitis	no	no	F	44	ex smoker	no	overweight	higher	yes	no	no	no
908	7	control	no	no	F	44	non smoker	no	overweight	lower	no	no	no	yes
909	7	asthma	yes	no	F	44	smoker	no	regular	higher	no	no	no	no
910	7	rhinitis	no	no	F	44	non smoker	no	regular	higher	no	no	no	no
911	7	control	no	no	F	44	non smoker	no	regular	higher	no	no	no	no
912	7	rhinitis	no	yes	F	44	non smoker	no	overweight	higher	yes	no	no	yes
913	7	asthma	no	no	F	44	non smoker	no	regular	higher	no	no	no	no
914	7	control	no	no	F	44	ex smoker	moderate	regular	higher	no	no	no	no
915	7	rhinitis	no	no	F	44	smoker	no	regular	higher	no	no	no	no
916	7	asthma	no	no	F	44	non smoker	no	obese	lower	yes	no	no	no
917	7	rhinitis	yes	no	F	44	non smoker	no	regular	higher	yes	no	no	no
918	7	rhinitis	no	no	F	44	non smoker	no	overweight	higher	yes	no	no	no
919	7	asthma	no	no	F	44	ex smoker	no	regular	lower	yes	no	yes	no
920	7	rhinitis	no	no	F	44	non smoker	no	regular	higher	no	no	no	yes
921	7	control	no	no	F	44	non smoker	no	regular	lower	yes	no	no	no
922	7	rhinitis	yes	no	F	44	ex smoker	no	overweight	higher	yes	no	yes	no
923	7	control	no	no	F	44	non smoker	no	regular	higher	yes	no	no	yes
924	7	control	no	no	F	44	non smoker	no	regular	higher	yes	no	no	no
925	7	control	no	no	F	44	non smoker	no	regular	higher	no	no	yes	no
926	7	rhinitis	yes	no	F	44	non smoker	no	regular	higher	no	no	no	no
927	7	asthma	no	no	F	44	ex smoker	no	obese	higher	yes	no	yes	yes
928	7	asthma	yes	no	F	44	non smoker	no	regular	higher	yes	yes	no	no
929	7	rhinitis	no	no	F	44	non smoker	no	regular	higher	yes	no	no	no
930	8	rhinitis	no	no	F	44	non smoker	no	regular	higher	no	no	no	no
931	8	rhinitis	no	no	F	44	non smoker	moderate	regular	higher	no	no	no	no
932	1	control	yes	no	M	45	smoker	no	overweight	higher	yes	no	no	yes
933	3	control	no	no	M	45	ex smoker	no	regular	higher	no	no	no	no
934	6	control	no	yes	M	45	smoker	high	regular	higher	no	no	no	no
935	2	rhinitis	no	no	M	45	non smoker	no	regular	higher	no	no	no	no
936	2	control	no	no	M	45	non smoker	no	overweight	higher	yes	no	no	yes
937	2	asthma	no	no	M	45	ex smoker	high	overweight	higher	yes	no	no	yes
938	11	rhinitis	no	no	M	45	smoker	moderate	overweight	higher	yes	no	no	no
939	11	bronchitis	no	no	M	45	non smoker	moderate	overweight	higher	no	no	no	no
940	11	control	no	no	M	45	ex smoker	no	regular	higher	no	yes	yes	no
941	11	asthma	no	no	M	45	smoker	no	overweight	higher	no	no	no	yes
942	4	asthma	no	no	M	45	smoker	moderate	regular	higher	no	no	no	no
943	4	asthma	no	no	M	45	non smoker	moderate		higher	no	no	no	no
944	4	asthma	no	no	M	45	smoker	no	obese	higher	yes	no	yes	yes
945	7	control	no	no	M	45	ex smoker	no	overweight	higher	yes	no	no	no
946	7	bronchitis	no	no	M	45	non smoker	moderate	regular	higher	no	no	no	yes
947	7	control	no	no	M	45	non smoker	high	obese	lower	no	no	yes	yes
948	7	rhinitis	no	no	M	45	ex smoker	high	overweight	higher	yes	no	no	no
949	7	control	no	no	M	45	non smoker	moderate	overweight	higher	yes	no	no	yes
950	7	control	no	no	M	45	non smoker	moderate	overweight	higher	yes	no	no	no
951	7	rhinitis	no	no	M	45	smoker	no	regular	higher	no	no	no	no
952	7	rhinitis	no	no	M	45	ex smoker	moderate	obese	higher	yes	no	yes	yes
953	7	rhinitis	no	no	M	45	non smoker	no	regular	higher	no	no	no	no
954	7	control	no	no	M	45	non smoker	moderate	regular	higher	no	no	no	no
955	7	control	no	no	M	45	ex smoker	moderate	overweight	higher	no	no	no	yes
956	7	control	no	no	M	45	non smoker	high	overweight	higher	no	no	no	yes
957	7	control	no	no	M	45	non smoker	no	regular	higher	no	no	no	no
958	7	control	no	no	M	45	non smoker	no	regular	higher	no	no	no	no
959	7	rhinitis	no	no	M	45	non smoker	moderate	regular	higher	no	no	yes	yes
960	7	rhinitis	no	no	M	45	non smoker	no	obese	higher	yes	no	no	yes
961	7	rhinitis	no	no	M	45	smoker	no	regular	higher	no	no	no	no
962	7	rhinitis	no	no	M	45	smoker	high	overweight	lower	yes	no	yes	no
963	7	rhinitis	no	no	M	45	non smoker	no	regular	higher	no	no	no	no
964	8	rhinitis	no	no	M	45	non smoker	no	overweight	higher	yes	no	yes	no
965	3	control	no	no	F	45	smoker	no	regular	higher	no	no	no	no
966	6	bronchitis	yes	no	F	45	non smoker	no	regular	higher	yes	no	yes	yes
967	6	control	no	no	F	45	non smoker	no	overweight	higher	no	no	no	no
968	2	rhinitis	no	no	F	45	non smoker	no	overweight	higher	no	no	yes	no
969	2	control	no	no	F	45	non smoker	no	regular	higher	no	no	no	no
970	2	rhinitis	no	no	F	45	non smoker	no	regular	higher	yes	no	no	no
971	2	rhinitis	no	no	F	45	ex smoker	no	regular	higher	yes	no	no	no
972	2	rhinitis	no	no	F	45	ex smoker	moderate	regular	higher	yes	no	no	no
973	11	control	no	no	F	45	non smoker	no	regular	higher	yes	yes	no	no
974	11	rhinitis	no	no	F	45	non smoker		regular	higher	yes	no	no	no
975	11	control	no	yes	F	45	non smoker	no	obese	higher	yes	no	no	no
976	11	asthma	no	no	F	45	non smoker	no	regular	higher	no	no	no	yes
977	4	rhinitis	no	no	F	45	non smoker	no	regular	higher	yes	no	no	no
978	4	bronchitis	no	no	F	45	ex smoker	no	obese	lower	yes	no	yes	yes
979	4	control	no	yes	F	45	smoker	no	regular	higher	yes	no	no	yes
980	4	rhinitis	no	no	F	45	smoker	no	regular	higher	yes	no	no	no
981	4	asthma	no	no	F	45	smoker	no	overweight	higher	yes	no	no	no
982	7	rhinitis	no	no	F	45	non smoker	no	overweight	higher	yes	no	no	no
983	7	control	no	no	F	45	non smoker	no	regular	higher	no	no	no	yes
984	7	control	no	no	F	45	non smoker	no	regular	higher	no	no	no	no
985	7	control	no	no	F	45	non smoker	no	regular	higher	no	no	no	no
986	7	rhinitis	no	no	F	45	non smoker	no	overweight	higher	yes	no	no	yes
987	7	control	yes	no	F	45	smoker	no	obese	lower	yes	no	yes	no
988	7	rhinitis	no	no	F	45	non smoker	no	overweight	higher	no	no	no	yes
989	7	rhinitis	no	no	F	45	smoker	no	obese	higher	yes	no	no	no
990	7	rhinitis	no	no	F	45	non smoker	no	regular	lower	yes	no	no	no
991	7	control	no	no	F	45	ex smoker	no	overweight	lower	yes	no	no	no
992	7	control	no	no	F	45	ex smoker	moderate	regular	higher	no	no	no	yes
993	7	rhinitis	no	no	F	45	non smoker	no	regular	higher	no	no	no	no
994	7	bronchitis	no	no	F	45	smoker	no	overweight	lower	no	no	no	no
995	7	control	no	no	F	45	ex smoker	no	overweight	higher	no	no	yes	no
996	7	asthma	no	no	F	45	non smoker	no	overweight	higher	yes	no	no	yes
997	7	rhinitis	no	no	F	45	non smoker	no	regular	higher	no	no	no	no
998	7	bronchitis	yes	no	F	45	non smoker	no	regular	higher	yes	no	no	no
999	7	rhinitis	no	no	F	45	ex smoker	high	regular	higher	no	no	no	no
1000	7	bronchitis	yes	yes	F	45	smoker	high	regular	higher	no	no	no	yes
1001	7	bronchitis	no	no	F	45	non smoker	no	regular	higher	yes	no	no	no
1002	7	control	no	no	F	45	non smoker	moderate	regular	higher	yes	no	no	no
1003	7	bronchitis	no	no	F	45	smoker	no	regular	higher	no	no	no	no
1004	7	bronchitis	yes	no	F	45	non smoker	no	regular	higher	yes	no	no	yes
1005	7	rhinitis	no	no	F	45	non smoker	no	regular	higher	yes	no	no	no
1006	7	control	no	no	F	45	non smoker	no	regular	higher	yes	no	no	no
1007	7	asthma	no	no	F	45	non smoker	high	regular	higher	no	no	no	no
1008	8	rhinitis	no	no	F	45	non smoker	no	regular	higher	yes	no	no	no
1009	8	rhinitis	no	no	F	45	non smoker	no		higher	yes	no	no	yes
1010	8	rhinitis	no	no	F	45	non smoker	no	obese	higher	yes	no	no	yes
1011	8	control	yes	no	F	45	ex smoker	no	regular	lower	no	no	no	no
1012	8	control	no	no	F	45	non smoker	no	regular	higher	yes	no	no	no
1013	8	asthma	no	no	F	45	non smoker	no	obese	higher	yes	no	no	no
1014	1	rhinitis	no	no	M	46	ex smoker	no	overweight	higher	yes	no	no	no
1015	6	asthma	no	no	M	46	non smoker	moderate	obese	higher	yes	no	no	yes
1016	6	rhinitis	no	no	M	46	non smoker	moderate	regular	higher	yes	no	no	no
1017	2	control	no	yes	M	46	ex smoker	no	overweight	higher	no	no	no	no
1018	2	rhinitis	no	no	M	46	non smoker	no	regular	higher	no	no	no	no
1019	2	asthma	no	no	M	46	non smoker		regular	higher	no	no	no	no
1020	11	bronchitis	no	yes	M	46	ex smoker	moderate	obese	lower	yes	no	yes	yes
1021	11	control	no	no	M	46	ex smoker	no	overweight	higher	no	no	no	no
1022	11	asthma	no	no	M	46	ex smoker	no	overweight	higher	no	no	no	no
1023	11	control	no	no	M	46	ex smoker	no	regular	higher	no	no	no	no
1024	11	rhinitis	no	no	M	46	non smoker	no	regular	higher	yes	no	no	yes
1025	11	rhinitis	no	no	M	46	non smoker	moderate	overweight	higher	yes	no	no	yes
1026	11	control	no	yes	M	46	ex smoker	no	overweight	higher	yes	no	no	yes
1027	4	rhinitis	no	no	M	46	non smoker	no	overweight	higher	yes	no	no	no
1028	4	control	no	no	M	46	non smoker	no	regular	higher	no	no	no	yes
1029	4	bronchitis	no	yes	M	46	non smoker	no	overweight	higher	yes	no	no	yes
1030	4	rhinitis	no	no	M	46	smoker	moderate	regular	higher	yes	no	yes	no
1031	4	rhinitis	no	no	M	46	smoker	moderate	overweight	higher	yes	no	no	no
1032	7	asthma	no	no	M	46	ex smoker	no	overweight	higher	no	no	yes	yes
1033	7	control	no	no	M	46	ex smoker	moderate	overweight	higher	yes	no	no	no
1034	7	asthma	no	no	M	46	ex smoker	no	overweight	lower	yes	no	no	no
1035	7	control	yes	no	M	46	ex smoker	moderate	overweight	higher	no	no	yes	no
1036	7	rhinitis	no	no	M	46	non smoker	moderate	overweight	higher	yes	no	yes	no
1037	7	bronchitis	no	no	M	46	ex smoker	moderate	regular	higher	no	no	no	no
1038	7	control	no	no	M	46	non smoker	moderate	regular	higher	yes	no	no	no
1039	7	rhinitis	yes	no	M	46	ex smoker	high	regular	lower	yes	no	yes	no
1040	7	asthma	no	yes	M	46	smoker		overweight	higher	yes	no	no	no
1041	7	control	no	no	M	46	ex smoker	no	overweight	lower	no	no	no	no
1042	7	rhinitis	no	no	M	46	non smoker	no	regular	higher	no	no	no	no
1043	7	asthma	yes	no	M	46	smoker	moderate	obese	higher	yes	no	yes	no
1044	7	control	no	no	M	46	non smoker	no	regular	higher	yes	no	no	no
1045	7	rhinitis	no	no	M	46	smoker	moderate	overweight	higher	no	no	no	yes
1046	7	asthma	no	no	M	46	ex smoker	moderate	overweight	higher	no	no	no	yes
1047	7	asthma	no	no	M	46	smoker	no	obese	higher	yes	no	yes	no
1048	7	asthma	no	no	M	46	ex smoker	high	overweight	higher	yes	no	no	no
1049	7	bronchitis	no	no	M	46	smoker	high	regular	higher	yes	no	no	no
1050	7	control	no	no	M	46	non smoker	no	obese	higher	yes	no	no	no
1051	7	control	no	no	M	46	smoker	no	obese	lower	yes	yes	yes	yes
1052	7	asthma	no	no	M	46	ex smoker	high	regular	higher	no	no	no	yes
1053	7	rhinitis	no	no	M	46	non smoker	moderate	regular	higher	no	no	no	no
1054	7	rhinitis	no	no	M	46	ex smoker	high	regular	higher	no	no	yes	no
1055	7	bronchitis	no	no	M	46	ex smoker	moderate	regular	lower	no	no	no	yes
1056	8	rhinitis	no	no	M	46	non smoker	no	overweight	higher	yes	no	no	no
1057	8	rhinitis	no	no	M	46	non smoker	no	regular	higher	yes	no	yes	no
1058	8	rhinitis	no	no	M	46	non smoker	no		higher	no	no	yes	yes
1059	8	rhinitis	no	no	M	46	ex smoker	high	regular	higher	no	no	no	no
1060	1	control	no	no	F	46	non smoker	no	regular	higher	no	no	no	yes
1061	1	control	no	no	F	46	non smoker	no	regular	higher	yes	no	no	no
1062	3	asthma	no	no	F	46	non smoker	no	regular	higher	no	no	no	yes
1063	3	control	no	yes	F	46	smoker	moderate	obese	higher	yes	no	no	no
1064	3	rhinitis	no	no	F	46	non smoker	no	overweight	higher	no	no	no	no
1065	3	control	no	no	F	46	ex smoker	no	regular	higher	yes	no	no	no
1066	6	control	no	no	F	46	ex smoker	high	regular	lower	yes	no	yes	no
1067	6	rhinitis	no	no	F	46	non smoker	no	regular	higher	no	no	no	yes
1068	2	rhinitis	no	no	F	46	ex smoker	no	obese	higher	no	no	no	no
1069	2	bronchitis	no	no	F	46	non smoker	no	regular	higher	yes	no	no	no
1070	2	asthma	no	no	F	46	non smoker	no	regular	higher	no	no	no	yes
1071	11	bronchitis	no	yes	F	46	non smoker	no	overweight	higher	yes	no	no	no
1072	11	asthma	no	no	F	46	non smoker	no	regular	higher	yes	no	no	no
1073	11	bronchitis	no	no	F	46	smoker	no	obese	lower	yes	no	yes	yes
1074	11	asthma	no	yes	F	46	smoker	no	regular	higher	yes	no	no	yes
1075	11	rhinitis	no	no	F	46	ex smoker	no	regular	higher	no	no	no	no
1076	4	bronchitis	no	no	F	46	non smoker	no	overweight	lower	yes	no	no	no
1077	4	rhinitis	no	no	F	46	non smoker	no	regular	higher	no	no	yes	no
1078	4	control	no	no	F	46	smoker	moderate	regular	higher	no	no	no	no
1079	4	control	no	no	F	46	non smoker	no	regular	higher	no	no	no	no
1080	4	bronchitis	no	yes	F	46	non smoker	no	obese	higher	yes	no	yes	no
1081	4	asthma	no	no	F	46	non smoker	no	regular	higher	no	no	no	no
1082	4	control	no	no	F	46	non smoker	no	obese	higher	yes	no	no	yes
1083	4	rhinitis	no	no	F	46	non smoker	no	regular	higher	yes	no	no	yes
1084	4	rhinitis	no	no	F	46	non smoker	no		higher	no	no	no	no
1085	7	control	no	no	F	46	non smoker	no	overweight	higher	no	no	yes	yes
1086	7	control	no	no	F	46	non smoker	no	regular	lower	no	no	no	no
1087	7	rhinitis	yes	no	F	46	smoker	no	regular	higher	yes	no	no	no
1088	7	rhinitis	no	no	F	46	non smoker	no	regular	higher	no	no	no	no
1089	7	rhinitis	no	no	F	46	non smoker	no	regular	higher	yes	no	no	no
1090	7	rhinitis	no	no	F	46	ex smoker	moderate	regular	higher	no	no	no	no
1091	7	asthma	no	no	F	46	smoker	no	regular	higher	no	no	no	no
1092	7	control	no	no	F	46	non smoker	no	overweight	higher	yes	no	no	yes
1093	7	rhinitis	no	no	F	46	ex smoker	moderate	regular	lower	yes	no	no	no
1094	7	control	no	no	F	46	non smoker	high	regular	higher	no	no	no	no
1095	7	rhinitis	no	no	F	46	ex smoker	no	regular	higher	no	no	no	yes
1096	7	control	no	no	F	46	non smoker	no	regular	higher	no	no	no	no
1097	7	rhinitis	no	no	F	46	non smoker	no	obese	higher	yes	no	no	no
1098	7	rhinitis	no	yes	F	46	non smoker	no	regular	higher	yes	no	no	no
1099	7	control	no	no	F	46	non smoker	no	regular	higher	yes	no	no	no
1100	7	asthma	no	no	F	46	non smoker	no	regular	higher	no	no	no	no
1101	7	control	no	yes	F	46	ex smoker	high	regular	higher	no	no	no	no
1102	7	rhinitis	no	no	F	46	non smoker	no	regular	higher	no	no	yes	yes
1103	7	asthma	yes	no	F	46	non smoker	no	regular	higher	no	no	no	yes
1104	8	rhinitis	no	no	F	46	non smoker	no	obese	higher	yes	no	no	no
1105	8	rhinitis	no	no	F	46	non smoker	no		higher	yes	no	no	yes
1106	8	rhinitis	no	no	F	46	ex smoker	no	regular	lower	yes	no	no	no
1107	8	rhinitis	no	no	F	46	non smoker	no	regular	higher	yes	no	no	no
1108	3	control	no	no	M	47	non smoker		overweight	higher	no	no	no	no
1109	3	rhinitis	no	no	M	47	non smoker	no	overweight		no	no	no	no
1110	6	rhinitis	no	no	M	47	non smoker	no	regular	higher	no	no	no	no
1111	6	asthma	no	no	M	47	non smoker	high	obese	higher	no	no	no	no
1112	2	asthma	no	no	M	47	ex smoker	high	overweight	lower	yes	no	no	no
1113	2	rhinitis	no	no	M	47	non smoker	high	overweight	higher	yes	no	no	no
1114	2	rhinitis	no	no	M	47	non smoker	no	overweight	higher	yes	no	no	no
1115	2	control	yes	no	M	47	ex smoker	moderate	overweight	higher	no	no	yes	no
1116	11	bronchitis	no	no	M	47	smoker		overweight	higher	yes	no	no	no
1117	11	rhinitis	no	no	M	47	ex smoker	moderate	regular	higher	yes	no	no	no
1118	11	control	no	no	M	47	non smoker	no	regular	higher	yes	no	no	yes
1119	11	rhinitis	no	no	M	47	non smoker	no	regular	higher	no	no	yes	yes
1120	11	rhinitis	no	no	M	47	smoker	moderate	overweight	lower	yes	no	no	yes
1121	4	rhinitis	no	no	M	47	non smoker	no	overweight	higher	no	no	no	no
1122	4	rhinitis	no	no	M	47	smoker	moderate	regular	higher	no	no	no	no
1123	4	control	no	no	M	47	ex smoker	no	overweight	higher	no	no	no	yes
1124	4	bronchitis	no	no	M	47	non smoker	high	regular	higher	yes	no	yes	no
1125	7	asthma	no	no	M	47	non smoker	no	regular	higher	no	no	no	yes
1126	7	rhinitis	yes	no	M	47	ex smoker	high	regular	higher	yes	no	yes	no
1127	7	control	no	no	M	47	ex smoker	no	regular	higher	yes	no	no	no
1128	7	asthma	no	yes	M	47	non smoker	moderate	overweight	higher	no	no	no	no
1129	7	rhinitis	no	yes	M	47	non smoker	high	regular	higher	no	no	yes	no
1130	7	rhinitis	no	no	M	47	non smoker	no	regular	higher	no	no	no	no
1131	7	rhinitis	no	no	M	47	non smoker	no	regular	higher	no	no	no	yes
1132	7	asthma	no	yes	M	47	ex smoker	moderate	overweight	higher	yes	no	no	yes
1133	7	asthma	no	no	M	47	smoker	high	overweight	higher	no	no	no	no
1134	7	control	no	no	M	47	ex smoker	moderate	regular	lower	yes	no	no	no
1135	7	control	no	no	M	47	ex smoker	no	overweight	higher	no	no	no	yes
1136	7	control	no	no	M	47	non smoker	moderate	regular	lower	yes	no	yes	no
1137	7	control	yes	no	M	47	non smoker	moderate	regular	higher	no	no	no	no
1138	7	control	no	no	M	47	smoker		overweight	lower	yes	no	no	no
1139	7	asthma	no	no	M	47	non smoker	no	overweight	higher	no	no	no	yes
1140	8	rhinitis	no	no	M	47	ex smoker	no	regular	higher	yes	no	no	yes
1141	8	asthma	no	no	M	47	ex smoker	no	overweight	lower	yes	no	no	no
1142	3	asthma	no	no	F	47	non smoker	no	regular	higher	yes	no	no	yes
1143	6	rhinitis	no	yes	F	47	non smoker	no	overweight	higher	no	no	no	no
1144	2	rhinitis	no	no	F	47	non smoker	moderate	regular	higher	yes	no	no	no
1145	2	rhinitis	no	no	F	47	smoker	no	overweight	higher	yes	no	no	no
1146	2	control	no	no	F	47	non smoker	no	regular	higher	yes	no	no	no
1147	2	rhinitis	no	no	F	47	non smoker	no	regular	higher	yes	no	no	no
1148	2	control	no	no	F	47	non smoker	no	regular	higher	yes	no	no	yes
1149	2	asthma	no	no	F	47	ex smoker	no	obese	higher	yes	no	yes	no
1150	2	asthma	no	no	F	47	ex smoker	no	regular	lower	no	no	no	no
1151	2	bronchitis	no	no	F	47	non smoker	no	overweight	lower	no	no	no	yes
1152	2	bronchitis	no	no	F	47	smoker	no	regular	lower	yes	no	no	no
1153	2	control	no	no	F	47	non smoker	no	overweight	higher	no	no	no	no
1154	2	rhinitis	no	no	F	47	ex smoker	no	regular	lower	no	no	no	no
1155	11	rhinitis	no	yes	F	47	ex smoker	moderate	regular	higher	no	no	no	no
1156	11	rhinitis	no	no	F	47	ex smoker	no	regular	lower	no	no	no	yes
1157	11	rhinitis	no	no	F	47	non smoker	no	obese	lower	no	no	yes	yes
1158	11	asthma	no	no	F	47	smoker	no	regular	lower	yes	no	no	no
1159	11	asthma	no	yes	F	47	non smoker	no	regular	higher	yes	no	no	no
1160	11	control	no	no	F	47	non smoker	moderate	regular	higher	yes	no	no	yes
1161	11	control	no	yes	F	47	ex smoker	moderate	regular	higher	yes	no	no	no
1162	11	rhinitis	no	no	F	47	non smoker	no	regular	higher	yes	no	yes	no
1163	11	control	no	no	F	47	non smoker	no	regular	higher	no	no	no	no
1164	4	bronchitis	no	no	F	47	smoker	high	regular	higher	no	no	no	no
1165	4	asthma	no	no	F	47	ex smoker	no	regular	higher	no	no	no	no
1166	4	bronchitis	no	no	F	47	ex smoker	no	regular	lower	yes	no	no	no
1167	4	rhinitis	no	no	F	47	ex smoker	no	regular	higher	yes	no	no	no
1168	4	rhinitis	no	no	F	47	non smoker	no	obese	higher	yes	no	no	no
1169	4	asthma	yes	no	F	47	non smoker	moderate	regular	higher	no	no	no	no
1170	7	asthma	no	no	F	47	non smoker	no	regular	higher	no	no	no	no
1171	7	control	no	no	F	47	non smoker	no	regular	higher	no	no	no	no
1172	7	bronchitis	no	no	F	47	ex smoker	no	overweight	higher	no	no	no	no
1173	7	control	no	no	F	47	non smoker	no	overweight	higher	yes	no	no	no
1174	7	asthma	yes	no	F	47	smoker	no	regular	higher	no	yes	no	yes
1175	7	rhinitis	no	no	F	47	non smoker	moderate	overweight	higher	yes	no	no	no
1176	7	control	no	no	F	47	non smoker	no	regular	higher	yes	no	no	no
1177	7	bronchitis	no	no	F	47	smoker	high	regular	higher	yes	no	no	no
1178	7	control	no	no	F	47	non smoker	no	regular	higher	yes	no	no	no
1179	7	control	no	no	F	47	non smoker	no	regular	higher	yes	no	no	no
1180	7	bronchitis	no	no	F	47	smoker	moderate	regular	higher	no	no	no	yes
1181	7	rhinitis	no	no	F	47	ex smoker	moderate		higher	yes	no	no	yes
1182	7	rhinitis	no	no	F	47	smoker	no	regular	higher	no	no	no	no
1183	7	bronchitis	no	no	F	47	smoker	high	overweight	higher	no	no	yes	no
1184	7	rhinitis	no	no	F	47	non smoker	no	overweight	lower	no	no	no	no
1185	7	control	no	no	F	47	smoker	no	regular	higher	yes	no	yes	no
1186	7	control	no	no	F	47	non smoker	no	regular	higher	no	no	no	no
1187	7	asthma	no	no	F	47	non smoker	no	regular	higher	no	no	no	yes
1188	7	rhinitis	no	no	F	47	non smoker	no	overweight	higher	no	no	no	yes
1189	8	rhinitis	no	no	F	47	non smoker	moderate	regular	higher	no	no	no	no
1190	1	control	no	no	M	48	ex smoker	no	regular	higher	yes	no	no	no
1191	1	rhinitis	no	no	M	48	smoker	high	overweight	lower	no	no	no	no
1192	1	rhinitis	no	no	M	48	smoker	high	regular	higher	no	no	no	no
1193	3	control	no	no	M	48	non smoker	no	obese	higher	no	no	no	no
1194	6	asthma	no	no	M	48	smoker	high	overweight	higher	no	no	yes	no
1195	6	control	no	no	M	48	ex smoker	high	overweight	higher	no	no	yes	no
1196	6	rhinitis	no	no	M	48	non smoker	moderate	obese	higher	no	no	yes	yes
1197	2	control	no	no	M	48	non smoker	moderate	regular	higher	no	no	no	no
1198	2	bronchitis	no	no	M	48	ex smoker	high	overweight	higher	yes	no	no	no
1199	2	asthma	no	no	M	48	ex smoker	no	overweight	higher	no	no	no	yes
1200	11	control	no	no	M	48	non smoker	no	overweight	lower	yes	no	no	no
1201	11	control	no	no	M	48	non smoker	moderate	overweight	higher	yes	no	no	yes
1202	11	bronchitis	no	no	M	48	ex smoker	high	regular	higher	yes	no	no	no
1203	11	rhinitis	no	no	M	48	ex smoker	no	overweight	higher	no	no	no	no
1204	4	rhinitis	no	no	M	48	ex smoker	moderate	overweight	higher	no	no	no	no
1205	4	bronchitis	no	no	M	48	smoker	high	obese	higher	yes	no	yes	no
1206	4	bronchitis	no	no	M	48	non smoker	no	overweight	higher	yes	no	no	yes
1207	4	rhinitis	no	no	M	48	smoker	high	overweight	higher	no	no	no	no
1208	4	bronchitis	no	no	M	48	smoker	moderate		lower	yes	no	no	yes
1209	4	rhinitis	no	no	M	48		no	regular	higher	no	no	no	no
1210	7	control	no	no	M	48	non smoker	high	overweight	higher	no	no	yes	no
1211	7	control	no	no	M	48	ex smoker	moderate	obese	higher	yes	no	no	no
1212	7	asthma	no	yes	M	48	non smoker	high	obese	higher	no	no	yes	no
1213	7	control	no	no	M	48	non smoker	high	overweight	higher	yes	no	yes	yes
1214	7	rhinitis	yes	no	M	48	non smoker	high	regular	higher	no	no	no	no
1215	7	asthma	no	no	M	48	smoker	moderate	overweight	higher	yes	no	yes	no
1216	7	bronchitis	yes	no	M	48	ex smoker	moderate	overweight	higher	no	no	no	no
1217	7	control	no	no	M	48	smoker	no	overweight	higher	no	no	no	no
1218	7	rhinitis	no	no	M	48	smoker	high	overweight	higher	yes	no	no	no
1219	7	rhinitis	no	no	M	48	non smoker	high	regular	higher	no	no	no	no
1220	7	asthma	no	no	M	48	non smoker	high	regular	higher	no	no	no	no
1221	7	control	yes	no	M	48	smoker	moderate	overweight	higher	no	no	no	yes
1222	7	rhinitis	no	no	M	48	smoker	no	regular	higher	no	no	no	yes
1223	7	rhinitis	no	no	M	48	non smoker	no	regular	higher	no	no	no	no
1224	7	control	no	no	M	48	non smoker	no	overweight	higher	no	no	yes	yes
1225	7	control	no	no	M	48	ex smoker	moderate	overweight	lower	yes	no	no	yes
1226	7	rhinitis	no	no	M	48	ex smoker	moderate	regular	higher	no	no	yes	yes
1227	7	control	no	no	M	48	non smoker	no	obese	higher	yes	no	yes	yes
1228	7	asthma	no	no	M	48	ex smoker	high	overweight	higher	no	no	no	no
1229	1	control	no	no	F	48	non smoker	no	regular	higher	yes	no	no	no
1230	1	rhinitis	no	no	F	48	ex smoker	no	overweight	higher	yes	no	no	no
1231	3	rhinitis	no	no	F	48	non smoker	no			yes	no	no	no
1232	2	control	no	no	F	48	non smoker	no	regular	higher	no	no	no	no
1233	2	asthma	no	no	F	48	ex smoker	no	regular	higher	yes	no	no	no
1234	2	control	no	no	F	48	non smoker	moderate	regular	higher	yes	no	no	yes
1235	11	rhinitis	no	no	F	48	non smoker	no	regular	lower	yes	no	no	no
1236	11	control	yes	no	F	48	non smoker	no	regular	higher	yes	no	no	yes
1237	11	rhinitis	no	yes	F	48	non smoker	no	overweight	higher	no	no	yes	no
1238	4	rhinitis	no	no	F	48	ex smoker			higher	yes	no	no	no
1239	4	asthma	no	no	F	48	smoker	no	regular	higher	yes	no	no	yes
1240	4	control	no	no	F	48	smoker	no	obese	higher	yes	no	no	no
1241	4	rhinitis	yes	no	F	48	non smoker	moderate	regular	lower	no	no	yes	yes
1242	4	asthma	no	no	F	48	non smoker	no	obese	lower	yes	no	no	no
1243	4	rhinitis	no	no	F	48	non smoker	no	regular	higher	no	no	no	no
1244	4	rhinitis	no	no	F	48	non smoker	no	obese	lower	yes	no	no	no
1245	4	rhinitis	no	no	F	48	non smoker	no	regular	higher	yes	no	yes	yes
1246	7	control	no	no	F	48	ex smoker	no	regular	higher	no	no	no	no
1247	7	asthma	no	no	F	48	non smoker	no	regular	higher	yes	no	no	no
1248	7	rhinitis	no	no	F	48	ex smoker	no	regular	higher	no	no	no	no
1249	7	control	no	no	F	48	non smoker	no	overweight	lower	no	no	no	no
1250	7	rhinitis	yes	no	F	48	ex smoker	moderate	regular	higher	yes	no	no	no
1251	7	rhinitis	no	no	F	48	ex smoker	no	regular	higher	yes	no	no	no
1252	7	control	no	no	F	48	smoker	no	overweight	lower	no	no	no	no
1253	7	control	no	no	F	48	smoker	moderate	regular	higher	yes	no	no	yes
1254	7	control	no	no	F	48	non smoker	moderate	regular	higher	yes	no	no	no
1255	7	rhinitis	yes	no	F	48	non smoker	no	regular	higher	yes	no	no	yes
1256	7	control	no	no	F	48	non smoker	no	regular	higher	yes	no	no	no
1257	7	rhinitis	yes	no	F	48	non smoker	no	overweight	higher	yes	no	yes	yes
1258	7	asthma	no	no	F	48	non smoker	no	regular	higher	no	no	no	no
1259	7	asthma	no	no	F	48	smoker	no	obese	higher	no	no	yes	no
1260	7	control	yes	no	F	48	non smoker	moderate	regular	higher	no	no	no	no
1261	7	rhinitis	no	no	F	48	ex smoker	high	regular	lower	no	no	no	yes
1262	7	bronchitis	no	no	F	48	smoker	no	overweight	higher	yes	no	yes	no
1263	1	asthma	no	no	M	49	ex smoker	no	overweight	higher	yes	no	no	yes
1264	1	rhinitis	no	no	M	49	non smoker	no	regular	higher	yes	no	no	no
1265	3	asthma	no	no	M	49	non smoker	moderate	regular	higher	no	no	no	no
1266	3	rhinitis	no	no	M	49	ex smoker		obese	higher	yes	no	no	no
1267	3	asthma	no	no	M	49	non smoker	no	regular	higher	yes	no	no	no
1268	3	asthma	no	no	M	49	non smoker	no	regular	higher	no	no	no	no
1269	6	rhinitis	yes	no	M	49	smoker	high	overweight	higher	no	no	no	yes
1270	6	rhinitis	no	no	M	49	ex smoker	high	obese	higher	no	no	no	yes
1271	2	control	no	no	M	49	ex smoker	no	overweight	lower	no	no	no	no
1272	2	rhinitis	no	no	M	49	smoker	moderate	overweight	higher	no	no	no	no
1273	2	control	no	no	M	49	non smoker	high	regular	higher	no	no	no	yes
1274	11	rhinitis	no	no	M	49	non smoker	no	regular	higher	yes	no	no	no
1275	11	rhinitis	no	no	M	49	ex smoker	high	obese	higher	no	yes	yes	yes
1276	11	rhinitis	yes	no	M	49	ex smoker	moderate	overweight	lower	no	no	yes	no
1277	11	rhinitis	no	no	M	49	non smoker	moderate	regular	higher	no	no	no	no
1278	11	rhinitis	no	no	M	49	smoker	no	regular	higher	yes	no	no	no
1279	4	asthma	no	no	M	49	smoker	moderate	regular	higher	yes	no	no	no
1280	4	control	no	no	M	49	non smoker	no	overweight	higher	no	no	no	no
1281	4	asthma	yes	no	M	49	non smoker	no	regular	higher	no	no	no	yes
1282	4	asthma	no	no	M	49	smoker	no	regular	higher	yes	no	no	no
1283	4	control	no	no	M	49	smoker	no	overweight	higher	yes	no	no	no
1284	4	bronchitis	no	no	M	49	non smoker	no		higher	yes	no	no	no
1285	4	bronchitis	no	no	M	49	smoker	moderate	overweight	lower	yes	no	yes	yes
1286	4	rhinitis	no	no	M	49	non smoker	no		higher	no	no	no	no
1287	4	rhinitis	no	no	M	49	non smoker		overweight	higher	no	no	no	no
1288	4	rhinitis	no	no	M	49	ex smoker	no	overweight	higher	yes	no	no	no
1289	7	rhinitis	yes	no	M	49	ex smoker	high	regular	higher	no	no	no	no
1290	7	control	no	no	M	49	smoker	high	regular	higher	yes	no	no	no
1291	7	asthma	no	no	M	49	non smoker	high	regular	higher	no	no	no	no
1292	7	control	no	no	M	49	non smoker	no	regular	higher	no	no	no	no
1293	7	bronchitis	no	no	M	49	smoker	no	overweight	higher	yes	no	no	yes
1294	7	control	no	no	M	49	ex smoker	no	overweight	higher	no	no	no	yes
1295	7	rhinitis	no	no	M	49	ex smoker	moderate	overweight	higher	no	no	no	yes
1296	7	asthma	yes	no	M	49	ex smoker	moderate	regular	higher	no	no	no	no
1297	7	asthma	no	no	M	49	ex smoker	moderate	overweight	lower	yes	no	yes	no
1298	7	rhinitis	no	no	M	49	non smoker	no	overweight	higher	yes	no	no	yes
1299	7	asthma	no	no	M	49	non smoker	high	overweight	higher	no	no	no	no
1300	7	control	no	no	M	49	ex smoker	moderate	regular	higher	no	no	yes	yes
1301	7	asthma	no	no	M	49	non smoker	moderate	regular	higher	no	no	no	no
1302	7	rhinitis	no	no	M	49	ex smoker	high	overweight	higher	no	no	no	yes
1303	7	rhinitis	no	no	M	49	smoker	moderate	overweight	higher	no	no	yes	no
1304	8	rhinitis	no	no	M	49	ex smoker	no	overweight	higher	yes	no	no	no
1305	1	control	no	no	F	49	ex smoker	no	obese	higher	yes	no	yes	no
1306	1	control	no	no	F	49	non smoker	no	regular	higher	yes	no	no	no
1307	3	rhinitis	no	no	F	49	non smoker	no	regular	higher	no	no	no	yes
1308	3	rhinitis	no	no	F	49	smoker	no	regular	higher	no	no	no	no
1309	6	rhinitis	yes	no	F	49	non smoker	high	regular	higher	no	no	no	yes
1310	6	rhinitis	no	no	F	49	non smoker	no	overweight	higher	yes	no	no	no
1311	2	rhinitis	no	no	F	49	non smoker	moderate	regular	higher	no	no	no	no
1312	2	rhinitis	no	no	F	49	non smoker	no	regular	higher	yes	no	no	no
1313	11	rhinitis	no	no	F	49	ex smoker	moderate	overweight	higher	no	no	no	no
1314	11	bronchitis	yes	no	F	49	non smoker	moderate	overweight	higher	no	no	yes	yes
1315	11	rhinitis	no	no	F	49	non smoker	no	regular	higher	no	no	no	no
1316	11	bronchitis	no	no	F	49	smoker	high	regular	higher	yes	no	no	yes
1317	11	rhinitis	no	no	F	49	ex smoker	no	regular	higher	yes	no	no	no
1318	4	asthma	no	no	F	49	ex smoker	no	regular	higher	yes	no	no	no
1319	4	control	no	no	F	49	non smoker	no	regular	higher	yes	no	no	yes
1320	4	bronchitis	no	no	F	49	non smoker	no	overweight	higher	no	no	no	yes
1321	4	control	no	no	F	49	ex smoker	high	regular	higher	no	no	no	yes
1322	7	control	yes	no	F	49	non smoker	moderate	regular	higher	yes	no	no	no
1323	7	bronchitis	no	no	F	49	smoker	high	regular	higher	yes	no	no	no
1324	7	rhinitis	yes	no	F	49	ex smoker	no	obese	higher	no	no	yes	yes
1325	7	rhinitis	no	no	F	49	non smoker	moderate	overweight	higher	no	no	no	yes
1326	7	control	no	no	F	49	non smoker	no	overweight	higher	no	no	no	no
1327	7	control	no	no	F	49	non smoker	no	regular	higher	no	no	no	no
1328	7	asthma	no	no	F	49	smoker	moderate	regular	higher	yes	no	no	no
1329	7	rhinitis	no	no	F	49	non smoker	no	regular	higher	yes	no	no	yes
1330	7	control	no	no	F	49	non smoker	no	obese	higher	no	no	yes	no
1331	7	control	no	no	F	49	ex smoker	no	regular	higher	yes	no	no	yes
1332	7	asthma	no	no	F	49	non smoker	no	regular	higher	yes	no	no	no
1333	7	rhinitis	no	no	F	49	non smoker	moderate	overweight	higher	yes	no	yes	no
1334	7	asthma	no	no	F	49	ex smoker	no	regular	higher	no	no	no	no
1335	7	control	yes	no	F	49	ex smoker	no	regular	higher	no	no	no	yes
1336	7	rhinitis	no	no	F	49	smoker	moderate	overweight	higher	no	no	yes	yes
1337	7	rhinitis	no	no	F	49	ex smoker	high	regular	higher	no	no	no	no
1338	7	control	no	no	F	49	non smoker	no	regular	higher	yes	no	no	no
1339	7	control	no	no	F	49	ex smoker	no	regular	higher	no	no	no	no
1340	7	control	no	no	F	49	ex smoker	moderate	regular	higher	no	no	no	no
1341	7	control	no	no	F	49	smoker	moderate	overweight	higher	yes	no	no	no
1342	7	rhinitis	no	yes	F	49	smoker	no	overweight	higher	yes	no	no	no
1343	3	control	no	no	M	50	non smoker	moderate	overweight	higher	yes	no	no	no
1344	3	control	no	no	M	50	non smoker	moderate	overweight	higher	no	no	no	no
1345	3	rhinitis	no	no	M	50	non smoker	no	regular	higher	no	no	no	no
1346	6	bronchitis	no	no	M	50	non smoker	moderate	regular	higher	no	no	no	yes
1347	2	control	no	no	M	50	ex smoker	moderate	obese	higher	yes	no	no	no
1348	11	rhinitis	no	no	M	50	ex smoker	moderate	regular	lower	yes	no	no	no
1349	11	rhinitis	no	no	M	50	non smoker	no	regular	higher	yes	no	no	no
1350	11	asthma	no	no	M	50	ex smoker	no	overweight	lower	yes	no	no	no
1351	11	control	no	no	M	50	non smoker	moderate	obese	lower	yes	no	yes	yes
1352	4	rhinitis	no	no	M	50	ex smoker	no	regular	higher	yes	no	no	no
1353	4	asthma	no	yes	M	50	ex smoker	no	obese	higher	yes	no	no	no
1354	7	control	no	no	M	50	non smoker	no	overweight	higher	yes	no	no	yes
1355	7	asthma	no	no	M	50	smoker	moderate	regular	higher	yes	no	no	no
1356	7	control	no	no	M	50	ex smoker	moderate	regular	higher	no	no	no	no
1357	7	bronchitis	no	no	M	50	smoker	moderate	obese	higher	no	no	yes	no
1358	7	control	no	no	M	50	ex smoker	moderate	regular	higher	yes	no	no	no
1359	7	asthma	yes	no	M	50	non smoker	moderate	overweight	higher	no	no	yes	no
1360	7	bronchitis	no	no	M	50	ex smoker	no	obese	higher	no	no	yes	yes
1361	7	rhinitis	no	no	M	50	smoker	no	regular	higher	yes	yes	no	no
1362	7	asthma	no	no	M	50	smoker	high	overweight	lower	yes	no	no	no
1363	7	asthma	no	no	M	50	smoker	no	overweight	higher	no	no	no	yes
1364	7	control	no	no	M	50	non smoker	no	regular	higher	yes	no	no	no
1365	7	control	no	no	M	50	ex smoker	no	overweight	higher	no	no	no	no
1366	7	control	no	no	M	50	smoker		obese	higher	no	no	no	yes
1367	7	rhinitis	no	no	M	50	ex smoker	moderate	overweight	higher	yes	no	yes	no
1368	7	rhinitis	no	no	M	50	ex smoker	no	regular	lower	yes	no	no	no
1369	7	control	no	yes	M	50	smoker		obese	higher	yes	yes	yes	no
1370	7	rhinitis	no	no	M	50	non smoker	moderate	regular	higher	no	no	no	yes
1371	7	control	no	no	M	50	ex smoker	high	obese	lower	yes	no	yes	no
1372	7	asthma	no	no	M	50	ex smoker	no	overweight	higher	no	no	no	yes
1373	8	rhinitis	no	no	M	50	non smoker	no	obese	higher	yes	no	no	no
1374	8	control	no	no	M	50	non smoker	moderate	overweight	higher	yes	no	no	yes
1375	3	asthma	no	no	F	50	smoker	no	regular	higher	yes	no	no	no
1376	3	asthma	no	no	F	50	non smoker	no	overweight	higher	no	no	no	yes
1377	3	control	no	no	F	50	ex smoker	no	regular	higher	no	no	no	no
1378	6	rhinitis	no	no	F	50	non smoker	high	overweight	higher	yes	no	yes	no
1379	2	rhinitis	no	no	F	50	non smoker	moderate	regular	higher	yes	no	no	yes
1380	2	asthma	yes	no	F	50	ex smoker	no	overweight	higher	yes	no	no	no
1381	11	rhinitis	no	no	F	50	non smoker	no	regular	higher	no	no	no	no
1382	11	rhinitis	yes	no	F	50	ex smoker	no	regular	higher	no	no	no	no
1383	11	asthma	yes	no	F	50	ex smoker	no	regular	higher	yes	no	no	no
1384	11	bronchitis	yes	no	F	50	non smoker	no	overweight	higher	yes	no	yes	no
1385	4	bronchitis	no	no	F	50	smoker	no	obese	lower	yes	no	no	yes
1386	4	rhinitis	no	no	F	50	ex smoker	moderate	regular		yes	no	no	no
1387	4	control	no	no	F	50	non smoker	no	regular	higher	no	no	no	no
1388	4	control	no	no	F	50	ex smoker	no	overweight	higher	yes	no	no	no
1389	4	rhinitis	no	no	F	50	ex smoker	moderate	regular	higher	yes	no	no	no
1390	4	asthma	no	no	F	50	non smoker		regular	higher	yes	no	no	no
1391	4	rhinitis	no	no	F	50	non smoker	no	regular	higher	yes	no	no	yes
1392	4	control	no	no	F	50	non smoker	no	overweight	higher	yes	no	no	no
1393	7	rhinitis	no	no	F	50	ex smoker	high	regular	higher	yes	no	yes	yes
1394	7	control	yes	no	F	50	non smoker	no	overweight	higher	yes	no	yes	no
1395	7	rhinitis	no	no	F	50	non smoker	no	obese	higher	yes	no	yes	no
1396	7	control	yes	no	F	50	non smoker	no	obese	higher	yes	no	no	no
1397	7	control	no	no	F	50	non smoker	no	regular	higher	yes	no	no	no
1398	7	rhinitis	no	no	F	50	ex smoker	moderate	overweight	higher	yes	no	no	no
1399	7	control	no	no	F	50	non smoker	no	overweight	higher	yes	no	no	no
1400	7	control	no	no	F	50	smoker	no	regular	lower	yes	no	no	yes
1401	7	rhinitis	yes	no	F	50	smoker	no	regular	lower	yes	no	yes	no
1402	7	control	no	no	F	50	non smoker	moderate	regular	higher	no	no	no	yes
1403	7	control	no	no	F	50	non smoker	no	overweight	higher	yes	no	no	no
1404	7	control	no	no	F	50	non smoker	no	obese	lower	yes	no	yes	yes
1405	7	rhinitis	no	no	F	50	ex smoker	moderate	regular	higher	yes	no	yes	no
1406	7	rhinitis	no	no	F	50	ex smoker	moderate	regular	lower	yes	no	no	no
1407	7	rhinitis	no	yes	F	50	ex smoker	moderate	regular	higher	no	no	no	no
1408	7	rhinitis	no	no	F	50	ex smoker	no	regular	higher	no	no	no	yes
1409	7	control	no	no	F	50	non smoker	no	regular	higher	no	no	no	no
1410	7	bronchitis	no	no	F	50	smoker	high	overweight	higher	yes	no	yes	yes
1411	7	control	no	yes	F	50	non smoker	no	regular	higher	no	no	no	no
1412	7	rhinitis	no	no	F	50	non smoker	no	obese	higher	no	no	no	no
1413	7	control	no	no	F	50	non smoker	no	overweight	higher	yes	no	no	no
1414	7	rhinitis	no	no	F	50	smoker	moderate	regular	higher	yes	no	no	no
1415	7	rhinitis	no	no	F	50	non smoker	moderate	overweight	higher	yes	no	no	no
1416	7	rhinitis	no	no	F	50	ex smoker	no	regular	lower	no	no	no	no
1417	7	control	no	no	F	50	non smoker	no	regular	higher	no	no	no	yes
1418	7	control	yes	no	F	50	ex smoker	no	regular	higher	no	no	no	no
1419	7	rhinitis	yes	no	F	50	non smoker	no	obese	lower	no	no	no	no
1420	7	rhinitis	no	no	F	50	non smoker	no	regular	higher	yes	no	yes	no
1421	7	control	no	no	F	50	ex smoker	no	overweight	higher	no	no	no	yes
1422	7	rhinitis	no	no	F	50	ex smoker	no	regular	higher	no	no	no	yes
1423	7	rhinitis	no	no	F	50	non smoker	high		higher	no	no	no	no
1424	8	rhinitis	no	no	F	50	non smoker	no	regular	higher	yes	no	no	no
1425	1	rhinitis	no	no	M	51	non smoker	no	overweight	higher	yes	no	no	no
1426	3	control	no	no	M	51	smoker	no	regular	higher	no	no	no	no
1427	3	control	no	no	M	51	non smoker	no	overweight	higher	no	no	no	no
1428	6	control	no	no	M	51	ex smoker	high	overweight	higher	no	no	yes	yes
1429	6	control	no	no	M	51	ex smoker	no	overweight	higher	no	no	no	yes
1430	6	rhinitis	no	no	M	51	ex smoker	moderate	obese	higher	yes	no	yes	no
1431	2	control	no	no	M	51	non smoker	moderate	obese	higher	yes	no	yes	no
1432	11	rhinitis	no	no	M	51	smoker	moderate	regular	lower	yes	no	no	no
1433	4	control	no	no	M	51	non smoker	no	overweight	higher	no	no	no	yes
1434	4	asthma	no	no	M	51	smoker	no	regular	higher	no	no	no	no
1435	4	rhinitis	yes	no	M	51	non smoker	no	regular	higher	yes	no	yes	yes
1436	4	asthma	no	no	M	51	non smoker	no	regular	higher	no	no	no	no
1437	4	bronchitis	no	no	M	51	smoker	moderate	overweight	lower	yes	no	yes	no
1438	4	control	no	no	M	51	non smoker	no	regular	higher	no	no	no	no
1439	4	asthma	no	no	M	51	non smoker	moderate		higher	no	no	no	no
1440	7	asthma	no	no	M	51	non smoker	high	overweight	higher	no	no	no	yes
1441	7	asthma	no	no	M	51	non smoker	high	overweight	higher	no	no	no	yes
1442	7	control	no	no	M	51	smoker	no	regular	higher	yes	no	no	no
1443	7	rhinitis	no	no	M	51	ex smoker	moderate	overweight	higher	yes	no	no	no
1444	7	control	no	no	M	51	ex smoker	no	overweight	higher	no	no	yes	yes
1445	7	control	no	no	M	51	non smoker	no	obese	higher	yes	no	yes	no
1446	7	rhinitis	no	no	M	51	non smoker	no	overweight	higher	no	no	no	yes
1447	7	control	no	no	M	51	ex smoker	no	obese	higher	yes	no	no	yes
1448	7	rhinitis	no	no	M	51	non smoker	moderate	regular	higher	yes	no	yes	yes
1449	7	control	no	no	M	51	non smoker	moderate	overweight	lower	no	no	no	no
1450	7	rhinitis	no	no	M	51	smoker	moderate	overweight	higher	no	no	yes	yes
1451	7	control	no	no	M	51	non smoker	moderate	overweight	higher	no	no	yes	yes
1452	6	rhinitis	yes	no	F	51	non smoker	moderate	overweight	higher	no	no	yes	no
1453	6	rhinitis	no	no	F	51	non smoker	moderate	regular	lower	no	no	no	no
1454	6	asthma	no	no	F	51	ex smoker	moderate	regular	higher	no	no	yes	no
1455	2	asthma	no	no	F	51	ex smoker	moderate	obese	lower	yes	no	yes	no
1456	2	asthma	no	no	F	51	non smoker	no	obese	lower	yes	no	no	no
1457	2	rhinitis	no	no	F	51	ex smoker	no	obese	lower	yes	yes	yes	no
1458	2	control	no	no	F	51	smoker	no	overweight	higher	no	no	no	no
1459	11	asthma	no	yes	F	51	ex smoker	no	regular	higher	yes	no	yes	yes
1460	11	control	no	no	F	51	non smoker	no	regular		yes	no	no	no
1461	11	rhinitis	no	no	F	51	non smoker	high	regular	lower	yes	no	no	no
1462	11	asthma	no	yes	F	51	ex smoker	no	regular	higher	yes	no	yes
1463	11	asthma	no	no	F	51	non smoker	no	regular	higher	no	no	yes	no
1464	4	asthma	no	no	F	51	non smoker	moderate	regular	higher	no	no	no	no
1465	4	asthma	no	no	F	51	ex smoker	no	overweight	higher	yes	no	yes	yes
1466	4	rhinitis	no	no	F	51	non smoker	moderate	overweight	higher	yes	no	no	no
1467	4	rhinitis	no	no	F	51	non smoker	no	regular	higher	yes	no	yes	yes
1468	4	asthma	no	no	F	51	ex smoker	no	regular	higher	no	no	no	no
1469	4	asthma	no	no	F	51	non smoker	no	regular	lower	no	no	no	no
1470	7	control	yes	no	F	51	ex smoker	high	overweight	higher	no	no	yes	no
1471	7	control	no	no	F	51	ex smoker	no	regular	higher	yes	no	no	no
1472	7	rhinitis	no	no	F	51	non smoker	moderate	regular	higher	no	no	no	no
1473	7	rhinitis	no	no	F	51	non smoker	no	regular	lower	yes	no	yes	no
1474	7	control	no	no	F	51	smoker	no	regular	higher	yes	no	no	no
1475	7	rhinitis	yes	no	F	51	non smoker	no	regular	higher	no	no	yes	no
1476	7	control	no	no	F	51	non smoker	no	regular	higher	no	no	no	no
1477	7	control	no	no	F	51	smoker	no	regular	higher	yes	no	no	no
1478	7	rhinitis	no	no	F	51	non smoker	no	regular	higher	no	no	no	no
1479	7	rhinitis	no	no	F	51	non smoker	no	regular	higher	yes	no	no	no
1480	7	asthma	no	no	F	51	non smoker	no	regular	lower	no	no	no	yes
1481	7	control	no	no	F	51	non smoker	no	regular	higher	yes	no	no	no
1482	7	rhinitis	no	no	F	51	non smoker	no	obese	lower	yes	no	no	no
1483	7	rhinitis	no	no	F	51	ex smoker	no	regular	higher	no	no	no	no
1484	7	control	yes	no	F	51		no	regular	higher	no	no	no	no
1485	7	rhinitis	no	no	F	51	smoker	no	regular	higher	no	yes	no	yes
1486	7	rhinitis	no	no	F	51	non smoker	no	regular	higher	yes	no	no	no
1487	7	rhinitis	no	no	F	51	non smoker	no	regular	higher	yes	no	no	no
1488	7	rhinitis	yes	no	F	51	ex smoker	no	regular	higher	no	no	no	no
1489	7	rhinitis	no	no	F	51	non smoker	no	overweight	higher	no	no	no	no
1490	8	control	no	no	F	51	non smoker	no	regular	higher	no	no	no	no
1491	8	rhinitis	no	no	F	51	ex smoker	no	regular	higher	yes	no	no	no
1492	1	control	no	no	M	52	ex smoker	high	overweight	higher	no	no	no	no
1493	6	rhinitis	no	no	M	52	non smoker	no	obese	higher	yes	yes	yes	yes
1494	6	rhinitis	no	no	M	52	non smoker	no	regular	higher	no	no	yes	yes
1495	2	rhinitis	no	no	M	52	non smoker	no	overweight	higher	yes	no	yes	no
1496	2	control	no	no	M	52	ex smoker	moderate	regular	higher	no	no	no	yes
1497	11	asthma	no	no	M	52	smoker	no	obese	higher	yes	no	no	no
1498	11	bronchitis	no	no	M	52	ex smoker	high	overweight	lower	no	no	yes	yes
1499	11	bronchitis	no	no	M	52	non smoker	high	overweight	higher	yes	no	yes	yes
1500	11	bronchitis	no	no	M	52	ex smoker	high	obese	lower	yes	no	no	no
1501	11	rhinitis	yes	no	M	52	non smoker	no	regular	higher	no	no	no	no
1502	4	control	yes	no	M	52	ex smoker	no	regular	higher	no	no	no	no
1503	4	control	no	no	M	52	smoker	no	regular	lower	no	no	no	no
1504	7	rhinitis	yes	no	M	52	non smoker	no	regular	higher	yes	no	yes	no
1505	7	control	no	no	M	52	smoker	no	overweight	higher	no	no	no	yes
1506	7	asthma	no	no	M	52	ex smoker	moderate	overweight	lower	yes	no	no	yes
1507	7	control	no	no	M	52	ex smoker	moderate	overweight	higher	yes	no	yes	no
1508	7	rhinitis	no	no	M	52	ex smoker	moderate	regular	higher	no	no	no	no
1509	7	rhinitis	no	no	M	52	ex smoker	high	obese	lower	no	no	yes	no
1510	7	control	no	no	M	52	ex smoker	no	overweight	higher	yes	no	yes	yes
1511	7	control	no	no	M	52	ex smoker	no	overweight	lower	yes	no	yes	no
1512	7	asthma	no	no	M	52	non smoker	no	obese	higher	no	no	yes	yes
1513	7	control	no	no	M	52	non smoker	moderate	overweight	higher	no	no	no	yes
1514	7	control	yes	no	M	52	non smoker	no	overweight	higher	no	no	no	no
1515	7	rhinitis	no	no	M	52	non smoker	no	regular	higher	no	no	no	no
1516	7	rhinitis	no	no	M	52	smoker	high	overweight	higher	yes	no	no	no
1517	7	control	no	no	M	52	non smoker	no	overweight	higher	no	no	no	no
1518	7	asthma	no	no	M	52	ex smoker	high	overweight	lower	yes	yes	yes	yes
1519	7	rhinitis	yes	no	M	52	non smoker	no	overweight	higher	no	no	yes	yes
1520	7	rhinitis	no	no	M	52	ex smoker	high	overweight	higher	yes	no	no	no
1521	7	rhinitis	no	no	M	52	non smoker	no	regular	higher	yes	no	yes	yes
1522	7	control	no	no	M	52	non smoker	moderate	obese	higher	no	no	no	yes
1523	7	rhinitis	no	no	M	52	smoker	moderate	overweight	higher	yes	no	no	no
1524	8	rhinitis	yes	no	M	52	ex smoker	no	regular	higher	no	no	no	no
1525	1	control	no	no	F	52	non smoker	no	regular	higher	no	no	no	no
1526	1	rhinitis	no	no	F	52	ex smoker	no	regular	higher	yes	no	no	yes
1527	3	asthma	no	no	F	52	non smoker	no	regular	higher	no	no	no	no
1528	3	asthma	no	no	F	52	non smoker	no	regular	higher	no	no	yes	yes
1529	3	control	no	no	F	52	ex smoker	no	overweight	higher	yes	no	yes	no
1530	6	rhinitis	no	no	F	52	smoker	no	obese	higher	yes	no	no	no
1531	6	control	no	no	F	52	ex smoker	no	overweight	higher	yes	no	no	no
1532	6	rhinitis	no	no	F	52	smoker	no	overweight	higher	no	no	no	no
1533	2	rhinitis	no	no	F	52	ex smoker	moderate	overweight	lower	yes	no	no	yes
1534	2	control	no	no	F	52	non smoker	no	regular	higher	no	no	no	no
1535	2	control	no	no	F	52	smoker	moderate	regular	higher	yes	no	no	no
1536	2	control	no	no	F	52	ex smoker	no	regular	higher	no	no	no	no
1537	2	bronchitis	no	no	F	52	smoker	no	regular	higher	yes	no	no	no
1538	11	asthma	no	no	F	52	ex smoker	no	regular	lower	yes	no	yes	no
1539	11	control	no	no	F	52	ex smoker	moderate	regular	higher	yes	no	no	no
1540	11	rhinitis	no	no	F	52	non smoker	no	overweight	higher	yes	no	no	no
1541	4	rhinitis	no	no	F	52	non smoker	no	regular	higher	no	no	no	no
1542	4	rhinitis	no	no	F	52	smoker	no		higher	no	no	yes	yes
1543	4	control	no	no	F	52	non smoker	moderate	regular	higher	no	no	no	no
1544	4	asthma	no	no	F	52	non smoker		regular	higher	yes	no	no	yes
1545	7	bronchitis	no	no	F	52	smoker	moderate	regular	higher	yes	no	no	no
1546	7	rhinitis	no	no	F	52	smoker	no	regular	higher	yes	no	no	no
1547	7	rhinitis	no	no	F	52	smoker	no	obese	higher	no	no	yes	no
1548	7	bronchitis	no	no	F	52	smoker	no	regular	higher	no	yes	no	no
1549	7	asthma	no	no	F	52	ex smoker	no	regular	higher	yes	no	no	no
1550	7	asthma	no	no	F	52	non smoker	no	regular	higher	yes	no	no	no
1551	7	rhinitis	yes	no	F	52	non smoker	moderate	regular	higher	yes	no	no	yes
1552	7	control	no	no	F	52	non smoker	no	regular	higher	yes	no	no	no
1553	7	asthma	no	no	F	52	non smoker	no	regular	higher	no	no	no	no
1554	7	rhinitis	no	no	F	52	ex smoker	no	regular	higher	yes	no	yes	yes
1555	7	control	no	no	F	52	non smoker	no	regular	higher	yes	no	no	no
1556	7	asthma	no	no	F	52	ex smoker	high	regular	higher	no	no	yes	yes
1557	7	control	yes	no	F	52	non smoker	no	regular	higher	yes	no	no	yes
1558	7	control	no	no	F	52	ex smoker	no	overweight	higher	no	no	no	no
1559	7	rhinitis	no	no	F	52	smoker	moderate	regular	higher	yes	no	yes	no
1560	7	control	no	no	F	52	ex smoker	no	regular	higher	yes	no	yes	no
1561	7	asthma	no	no	F	52	ex smoker	moderate	overweight	higher	yes	no	no	no
1562	7	asthma	yes	no	F	52	non smoker	no	regular	higher	no	no	no	no
1563	7	control	no	no	F	52	ex smoker	no	regular	higher	yes	no	no	no
1564	8	asthma	no	no	F	52	ex smoker	no	overweight	lower	yes	no	yes	yes
1565	8	control	no	no	F	52	non smoker	no	regular	higher	yes	no	no	no
1566	8	asthma	no	no	F	52	ex smoker	no	obese	higher	yes	no	yes	yes
1567	1	rhinitis	no	no	M	53	non smoker	no	obese	higher	yes	no	no	no
1568	3	rhinitis	no	no	M	53	non smoker	no	regular	higher	no	no	no	no
1569	3	bronchitis	no	no	M	53	ex smoker	high	overweight	higher	yes	no	no	yes
1570	6	rhinitis	yes	no	M	53	smoker	moderate	obese	lower	yes	no	yes	no
1571	6	rhinitis	no	yes	M	53	non smoker	high	overweight	lower	no	no	yes	yes
1572	6	bronchitis	no	no	M	53	smoker	high	overweight	higher	no	no	no	yes
1573	2	control	no	no	M	53	non smoker	no	overweight	higher	no	no	no	no
1574	11	control	no	no	M	53	ex smoker	high	obese	higher	yes	no	no	no
1575	11	control	no	no	M	53	ex smoker	high	regular	higher	yes	no	no	no
1576	11	rhinitis	no	no	M	53	non smoker	high	regular	higher	yes	no	no	no
1577	11	control	no	no	M	53	ex smoker	no	overweight	higher	no	no	no	yes
1578	4	bronchitis	no	no	M	53	smoker	moderate	regular	higher	yes	no	yes	no
1579	7	control	no	no	M	53	ex smoker	no	overweight	higher	no	no	no	no
1580	7	asthma	no	no	M	53	non smoker	moderate	overweight	higher	no	no	no	no
1581	7	control	yes	no	M	53	non smoker	no	overweight	higher	no	no	yes	no
1582	7	rhinitis	no	no	M	53	non smoker	moderate	overweight	lower	yes	no	no	no
1583	7	rhinitis	no	no	M	53	smoker	high	regular	higher	no	no	no	no
1584	7	asthma	no	no	M	53	smoker	moderate	regular	lower	no	no	no	no
1585	7	control	no	no	M	53	non smoker	no	obese	lower	yes	no	no	no
1586	7	control			M	53	non smoker	no	obese	higher	yes			no
1587	7	rhinitis	no	no	M	53	smoker	no	regular	higher	yes	no	no	yes
1588	7	rhinitis	no	no	M	53	non smoker	no	overweight	higher	no	no	yes	no
1589	7	control	no	no	M	53	ex smoker	no	obese	higher	no	no	yes	yes
1590	7	control	no	no	M	53	ex smoker	high	overweight	higher	no	no	no	yes
1591	7	control	no	no	M	53	ex smoker	moderate	regular	higher	no	no	yes	no
1592	7	bronchitis	no	no	M	53	non smoker	high	obese	higher	yes	no	yes	no
1593	7	rhinitis	no	no	M	53	ex smoker	no	overweight	higher	yes	no	no	no
1594	8	rhinitis	no	no	M	53	non smoker	no		higher	yes	no	yes	yes
1595	8	control	no	no	M	53	ex smoker	high	regular	higher	yes	no	no	yes
1596	1	control	no	no	F	53	ex smoker	no	obese	higher	yes	no	yes	no
1597	1	rhinitis	yes	no	F	53	ex smoker	high	regular	higher	no	no	no	no
1598	1	control	no	no	F	53	non smoker	no	overweight	higher	yes	no	yes	yes
1599	1	rhinitis	no	no	F	53	smoker	no	regular	higher	yes	no	yes	no
1600	3	bronchitis	no	no	F	53	ex smoker	no	overweight	lower	yes	yes	yes	no
1601	3	rhinitis	no	no	F	53	ex smoker	moderate	regular	higher	no	no	no	no
1602	3	control	no	no	F	53	non smoker	no	obese	lower	yes	no	no	no
1603	3	rhinitis	no	no	F	53	non smoker	no	regular	higher	no	no	no	no
1604	6	rhinitis	no	no	F	53	ex smoker	no	obese	higher	yes	no	yes	no
1605	6	rhinitis	no	no	F	53	non smoker	no	obese	higher	yes	no	no	yes
1606	2	asthma	no	no	F	53	smoker	no	regular	higher	yes	no	no	no
1607	2	rhinitis	no	no	F	53	non smoker	moderate	regular	higher	no	no	no	no
1608	2	rhinitis	no	no	F	53	non smoker	no	overweight	higher	yes	no	no	yes
1609	2	rhinitis	no	no	F	53	non smoker	no	obese	higher	yes	no	yes	yes
1610	11	rhinitis	no	no	F	53	non smoker	no	regular	higher	yes	no	no	no
1611	4	rhinitis	no	no	F	53	non smoker	no	overweight	higher	no	no	no	no
1612	4	rhinitis	no	no	F	53	ex smoker	no	regular	lower	no	no	no	yes
1613	4	rhinitis	no	no	F	53	ex smoker	no	overweight	higher	no	no	no	no
1614	4	bronchitis	no	no	F	53	smoker	no	regular	higher	yes	no	no	yes
1615	4	rhinitis	no	no	F	53	ex smoker	no	regular	higher	no	no	no	no
1616	7	bronchitis	no	no	F	53	smoker	no	regular	higher	yes	no	no	yes
1617	7	control	no	no	F	53	non smoker	no	regular	higher	yes	no	no	no
1618	7	rhinitis	no	no	F	53	non smoker	no	overweight	higher	yes	no	no	no
1619	7	rhinitis	no	no	F	53	ex smoker	no	overweight	lower	no	no	yes	yes
1620	7	control	no	no	F	53	non smoker	no	regular	higher	no	no	no	no
1621	7	control	no	no	F	53	non smoker	no	obese	higher	no	no	yes	yes
1622	7	control	no	no	F	53	smoker		overweight	higher	yes	no	no	no
1623	7	asthma	no	no	F	53	ex smoker	no	regular	higher	no	no	no	no
1624	7	rhinitis	no	no	F	53	non smoker	no	regular	lower	no	no	yes	no
1625	7	rhinitis	no	no	F	53	non smoker	no	regular	higher	no	no	no	no
1626	7	asthma	no	no	F	53	ex smoker	moderate	overweight	higher	yes	no	no	no
1627	7	control	no	no	F	53	non smoker	no	regular	lower	no	no	no	no
1628	7	control	no	no	F	53	smoker	no	obese	lower	no	no	yes	no
1629	7	control	no	no	F	53	non smoker	moderate	regular	higher	yes	no	yes	no
1630	7	asthma	no	no	F	53	non smoker	moderate	regular	higher	yes	no	no	no
1631	7	rhinitis	no	no	F	53	non smoker	no	regular	higher	no	no	no	yes
1632	7	control	no	yes	F	53	smoker	moderate	obese	higher	yes	no	no	yes
1633	7	rhinitis	no	no	F	53	smoker	no	regular	higher	yes	no	no	yes
1634	8	rhinitis	no	no	F	53	ex smoker	no	regular	higher	yes	no	no	no
1635	1	control	no	no	M	54	smoker	no	overweight	higher	yes	no	no	no
1636	2	bronchitis	no	no	M	54	ex smoker	no	obese	lower	no	no	yes	yes
1637	2	rhinitis	no	no	M	54	ex smoker	no	regular	higher	no	no	yes	no
1638	11	rhinitis	no	no	M	54	non smoker	no	obese	higher	no	no	no	no
1639	11	rhinitis	no	no	M	54	smoker	no	overweight	higher	no	no	yes	yes
1640	11	rhinitis	no	no	M	54	ex smoker	high	overweight	higher	no	no	no	no
1641	11	bronchitis	no	no	M	54	ex smoker	moderate	regular	higher	no	no	yes	yes
1642	4	asthma	no	no	M	54	ex smoker	moderate	overweight		yes	no	no	no
1643	4	control	no	no	M	54	non smoker	no	overweight	higher	no	no	no	yes
1644	7	control	no	no	M	54	non smoker	no	overweight	lower	no	no	yes	no
1645	7	control	no	no	M	54	smoker	high	regular	higher	no	no	no	no
1646	7	control	no	no	M	54	ex smoker	no	regular	higher	no	no	no	no
1647	7	rhinitis	no	no	M	54	non smoker	no	obese	lower	yes	no	no	no
1648	7	rhinitis	no	no	M	54	ex smoker	no	regular	higher	no	no	no	no
1649	7	control	no	no	M	54	ex smoker	no	regular	higher	no	no	no	yes
1650	7	rhinitis	no	no	M	54	non smoker	no	overweight	higher	no	no	yes	no
1651	7	control	no	no	M	54	ex smoker	no	obese	lower	no	no	no	yes
1652	7	control	no	no	M	54	ex smoker	high	overweight	lower	no	yes	no	no
1653	7	control	no	no	M	54	ex smoker	high	overweight	higher	no	no	no	no
1654	7	bronchitis	yes	no	M	54	non smoker	no	regular	higher	no	no	no	no
1655	7	control	no	no	M	54	ex smoker	no	regular	higher	no	no	no	no
1656	7	control	no	no	M	54	ex smoker	no	overweight	higher	yes	no	no	no
1657	7	control	no	no	M	54	ex smoker	no	regular	higher	no	no	no	yes
1658	1	control	no	yes	F	54	non smoker	no	regular	higher	yes	no	yes	no
1659	1	control	no	no	F	54	non smoker	no	regular	higher	yes	no	no	no
1660	1	control	no	no	F	54	non smoker	no	regular	higher	yes	no	no	no
1661	1	control	no	no	F	54	ex smoker	no	regular	higher	yes	no	no	yes
1662	1	control	no	no	F	54	non smoker	no	overweight	higher	no	no	yes	no
1663	1	control	no	no	F	54	non smoker	no	regular	higher	yes	no	no	no
1664	3	control	no	no	F	54	smoker	moderate	regular	higher	no	no	no	yes
1665	3	bronchitis	no	no	F	54	non smoker	no	regular	higher	yes	no	no	no
1666	3	rhinitis	no	no	F	54	non smoker	no	regular	higher	yes	no	no	no
1667	11	rhinitis	no	no	F	54	ex smoker	no	obese	higher	no	no	no	no
1668	11	control	no	no	F	54	smoker	no	regular	lower	yes	no	no	no
1669	11	control	no	no	F	54	ex smoker	moderate	regular	higher	no	no	no	no
1670	4	bronchitis	no	no	F	54	smoker	no	regular	higher	no	no	no	no
1671	4	rhinitis	no	no	F	54	ex smoker	no	regular	higher	no	no	no	yes
1672	4	bronchitis	no	no	F	54	non smoker	no	regular	lower	yes	no	no	no
1673	7	rhinitis	no	no	F	54	non smoker	no	regular	higher	no	no	no	no
1674	7	control	no	no	F	54	smoker	no	overweight	higher	yes	no	yes	yes
1675	7	control	no	no	F	54	ex smoker	no	overweight	lower	yes	no	no	no
1676	7	rhinitis	no	no	F	54	non smoker	high	regular	higher	yes	no	no	no
1677	7	bronchitis	no	no	F	54	non smoker	no	regular	lower	no	no	no	no
1678	7	control	no	no	F	54	ex smoker	no	regular	lower	no	no	no	yes
1679	7	control	no	no	F	54	non smoker	moderate	regular	lower	no	no	no	no
1680	7	control	no	no	F	54	non smoker	no	overweight	higher	no	no	no	no
1681	7	bronchitis	yes	no	F	54	non smoker	no	overweight	higher	yes	no	no	no
1682	7	rhinitis	yes	no	F	54	ex smoker	no	obese	higher	yes	no	yes	no
1683	1	rhinitis	yes	no	M	55	ex smoker	moderate	overweight	higher	no	no	yes	yes
1684	3	control	no	no	M	55	ex smoker	no	overweight	lower	yes	no	yes	yes
1685	6	rhinitis	no	no	M	55	non smoker	high	regular	higher	no	no	no	yes
1686	6	bronchitis	no	no	M	55	ex smoker	moderate	overweight	higher	yes	no	no	yes
1687	6	rhinitis	no	no	M	55	non smoker	moderate	regular	higher	yes	no	no	no
1688	6	rhinitis	no	no	M	55	ex smoker	high	obese	higher	yes	no	no	no
1689	2	asthma	no	no	M	55	non smoker	no	overweight	higher	yes	no	no	no
1690	2	rhinitis	yes	no	M	55	smoker	no	overweight	higher	yes	no	yes	no
1691	11	control	no	no	M	55	ex smoker	no	regular	higher	yes	no	no	no
1692	4	bronchitis	no	no	M	55	ex smoker		obese	higher	yes	no	yes	no
1693	4	control	no	no	M	55	non smoker	no	overweight	higher	yes	no	no	yes
1694	4	control	no	no	M	55	ex smoker	no	regular	higher	no	no	no	no
1695	4	control	no	no	M	55	ex smoker	no	overweight	higher	no	no	no	no
1696	7	control	no	no	M	55	smoker	moderate	regular	higher	yes	no	no	no
1697	7	rhinitis	no	no	M	55	ex smoker	moderate	overweight	higher	no	no	yes	yes
1698	7	asthma	no	no	M	55	ex smoker	high	regular	higher	no	no	no	no
1699	7	asthma	yes	no	M	55	ex smoker	moderate	overweight	lower	yes	no	yes	no
1700	7	control	no	no	M	55	ex smoker	moderate	obese	lower	yes	no	no	yes
1701	7	control	yes	no	M	55	ex smoker	moderate	regular	higher	no	no	no	no
1702	7	control	no	no	M	55	non smoker		obese	lower	yes	no	yes	no
1703	7	control	no	no	M	55	ex smoker	no	regular	lower	yes	no	no	no
1704	7	rhinitis	no	yes	M	55	smoker	moderate	overweight	higher	no	no	no	no
1705	7	control	no	no	M	55	smoker	no	overweight	higher	no	no	no	no
1706	7	control	no	no	M	55	non smoker	no	obese	higher	no	no	yes	yes
1707	7	rhinitis	no	no	M	55	non smoker	high	overweight	higher	no	no	no	yes
1708	7	rhinitis	yes	no	M	55	ex smoker	no	overweight	higher	yes	no	no	no
1709	7	control	no	no	M	55	ex smoker	moderate	overweight	higher	no	no	no	no
1710	7	control	yes	no	M	55	ex smoker	high	regular	higher	no	no	no	yes
1711	7	asthma	no	no	M	55	non smoker	moderate	overweight	higher	no	no	yes	yes
1712	1	control	no	no	F	55	smoker	no	regular	lower	no	no	no	no
1713	1	rhinitis	no	no	F	55	ex smoker	no	obese	lower	no	no	no	no
1714	3	rhinitis	no	no	F	55	non smoker	no	regular	higher	no	no	no	no
1715	3	bronchitis	no	yes	F	55	smoker	no	obese	higher	no	no	yes	yes
1716	6	control	no	no	F	55	non smoker	high	regular	higher	yes	no	no	no
1717	6	rhinitis	no	no	F	55	non smoker	no	regular	lower	yes	no	no	no
1718	2	asthma	no	no	F	55	non smoker	no	obese	higher	no	no	yes	yes
1719	2	rhinitis	no	no	F	55	non smoker	no	overweight	higher	yes	no	no	no
1720	11	control	no	no	F	55	smoker	no	regular	higher	yes	no	no	no
1721	11	rhinitis	no	no	F	55	non smoker	no	regular	higher	no	no	no	yes
1722	11	bronchitis	no	no	F	55	smoker	no	regular	higher	yes	no	no	yes
1723	4	control	no	no	F	55	ex smoker	no	regular	higher	yes	no	no	no
1724	7	bronchitis	no	no	F	55	non smoker	no	overweight	higher	no	no	yes	no
1725	7	bronchitis	no	yes	F	55	non smoker	moderate	regular	higher	no	no	no	no
1726	7	rhinitis	no	no	F	55	smoker	no	overweight	lower	yes	no	no	yes
1727	7	control	no	no	F	55	non smoker	no	regular	higher	yes	no	yes	no
1728	7	rhinitis	no	no	F	55	ex smoker	moderate	overweight	lower	yes	no	yes	yes
1729	7	rhinitis	yes	no	F	55	ex smoker	no	regular	higher	yes	no	no	no
1730	7	asthma	no	no	F	55	smoker	moderate	regular	lower	no	no	yes	no
1731	7	control	no	no	F	55	non smoker	moderate	overweight	lower	no	no	no	no
1732	7	rhinitis	no	no	F	55	non smoker	moderate	regular	higher	no	no	no	no
1733	7	rhinitis	no	no	F	55	ex smoker	no	overweight	higher	yes	no	no	no
1734	7	bronchitis	no	no	F	55	ex smoker	moderate	regular	lower	yes	no	no	no
1735	7	control	no	no	F	55	non smoker	no	regular	higher	no	no	no	yes
1736	7	rhinitis	yes	no	F	55	smoker	no	obese	lower	yes	yes	yes	yes
1737	7	rhinitis	no	no	F	55	ex smoker	no	regular	lower	yes	no	no	no
1738	7	rhinitis	no	no	F	55	non smoker	no	regular	higher	yes	no	no	no
1739	1	bronchitis	no	no	M	56	ex smoker	high	regular	higher	yes	no	no	no
1740	1	asthma	no	no	M	56	non smoker	no	regular	higher	no	no	yes	no
1741	1	control	no	no	M	56	smoker	no	overweight	higher	yes	yes	yes	no
1742	3	rhinitis	yes	no	M	56	non smoker	high		higher	yes	no	no	no
1743	3	control	no	no	M	56	ex smoker	high	obese	higher	no	yes	yes	yes
1744	6	asthma	no	no	M	56	non smoker	moderate	overweight	higher	yes	no	yes	yes
1745	6	rhinitis	no	no	M	56	non smoker	moderate	regular	higher	no	no	no	no
1746	2	control	no	no	M	56	ex smoker	moderate	overweight	higher	no	no	no	no
1747	2	control	no	no	M	56	non smoker		regular	higher	yes	no	no	yes
1748	2	control	no	no	M	56	non smoker	moderate	regular	higher	yes	no	no	no
1749	2	asthma	yes	no	M	56	smoker	no	overweight	higher	yes	no	no	yes
1750	2	control	no	no	M	56	ex smoker	high	overweight	higher	no	no	yes	yes
1751	11	asthma	no	no	M	56	ex smoker	high	overweight	higher	yes	no	yes	yes
1752	11	rhinitis	no	no	M	56	ex smoker	moderate	obese	lower	yes	yes	yes	yes
1753	4	rhinitis	no	no	M	56	non smoker	no	overweight	higher	no	no	no	yes
1754	4	asthma	no	no	M	56	ex smoker	no	regular	higher	yes	no	no	no
1755	4	rhinitis	no	no	M	56	smoker	no	overweight	higher	yes	no	no	no
1756	4	rhinitis	no	no	M	56	ex smoker	no		higher	yes	no	yes	no
1757	7	bronchitis	no	no	M	56	smoker	no	overweight	lower	no	yes	no	yes
1758	7	rhinitis	no	no	M	56	ex smoker		regular	higher	no	no	no	no
1759	7	rhinitis	yes	yes	M	56	ex smoker	high	overweight	higher	no	no	yes	yes
1760	7	control	yes	no	M	56	non smoker	no	overweight	higher	yes	no	no	yes
1761	7	control	yes	no	M	56	ex smoker	high	regular	lower	no	no	no	no
1762	7	control	no	no	M	56	non smoker	moderate	overweight	lower	yes	no	yes	no
1763	7	rhinitis	no	no	M	56	ex smoker	no	overweight	higher	no	no	no	no
1764	7	control	yes	no	M	56	ex smoker	no	obese	lower	yes	no	yes	yes
1765	7	rhinitis	no	no	M	56	ex smoker	no	regular	higher	no	no	yes	yes
1766	7	control	yes	no	M	56	ex smoker	moderate	obese	higher	yes	no	no	yes
1767	7	control	no	yes	M	56	ex smoker	high	overweight	higher	no	no	yes	no
1768	7	control	no	no	M	56	ex smoker	high	obese	higher	no	no	yes	yes
1769	7	control	no	no	M	56	non smoker	no	overweight	higher	no	yes	yes	no
1770	7	rhinitis	yes	no	M	56	non smoker	no	overweight	higher	no	no	yes	no
1771	1	control	no	no	F	56	ex smoker	no	regular	higher	yes	no	no	no
1772	3	control	no	no	F	56	non smoker	no	overweight	higher	no	no	no	yes
1773	6	control	no	no	F	56	ex smoker	moderate	obese	higher	yes	no	no	yes
1774	2	rhinitis	no	no	F	56	non smoker	no	regular	higher	no	no	no	yes
1775	2	control	no	no	F	56	smoker	no	overweight	higher	yes	no	no	yes
1776	2	control	no	no	F	56	non smoker	no	regular	lower	yes	no	yes	yes
1777	11	control	no	no	F	56	non smoker	no	regular	higher	no	no	no	no
1778	11	rhinitis	no	no	F	56	ex smoker	high	overweight	higher	no	no	no	yes
1779	11	asthma	no	no	F	56	non smoker	no	overweight	higher	yes	no	no	yes
1780	4	bronchitis	no	no	F	56	non smoker	moderate	overweight	lower	yes	no	yes	yes
1781	4	rhinitis	no	no	F	56	non smoker	no	obese	higher	no	no	yes	yes
1782	4	rhinitis	no	no	F	56	ex smoker	no	regular	higher	no	no	no	yes
1783	4	control	no	no	F	56	non smoker	no	regular	higher	yes	no	no	no
1784	4	rhinitis	no	no	F	56	smoker	high	regular	higher	no	no	yes	no
1785	4	rhinitis		no	F	56	smoker	no	overweight	higher	no	yes	yes	yes
1786	7	rhinitis	no	no	F	56	non smoker	no	regular	higher	yes	no	no	no
1787	7	control	yes	no	F	56	non smoker	no	overweight	lower	no	no	no	no
1788	7	control	no	no	F	56	smoker	moderate	regular	higher	yes	no	no	no
1789	7	control	no	no	F	56	ex smoker	no	regular	higher	no	no	no	yes
1790	7	rhinitis	no	no	F	56	non smoker	moderate	regular	higher	no	no	no	no
1791	7	rhinitis	no	yes	F	56	non smoker	moderate	regular	lower	yes	no	no	yes
1792	7	control	no	no	F	56	non smoker	no	overweight	higher	no	no	no	yes
1793	1	control	no	no	M	57	ex smoker	high	overweight	higher	no	no	no	yes
1794	3	rhinitis	no	no	M	57	ex smoker	no	obese	higher	yes	no	yes	yes
1795	2	bronchitis	no	no	M	57	non smoker	moderate	regular	higher	no	no	yes	yes
1796	2	rhinitis	no	no	M	57	non smoker	no	regular	lower	yes	no	no	no
1797	11	bronchitis	no	no	M	57	non smoker	no	overweight	higher	no	no	no	yes
1798	11	bronchitis	no	no	M	57	smoker	high	overweight	lower	yes	yes	no	yes
1799	4	rhinitis	no	no	M	57	ex smoker	no		higher	no	no	no	no
1800	4	rhinitis	no	no	M	57	ex smoker	moderate	regular	higher	yes	no	no	no
1801	7	rhinitis	no	no	M	57	ex smoker	no	regular	lower	yes	no	yes	no
1802	7	control	yes	no	M	57	non smoker	no	overweight	lower	no	no	no	yes
1803	7	control	no	no	M	57	ex smoker	moderate	overweight	higher	yes	no	no	yes
1804	7	rhinitis	no	no	M	57	ex smoker	no	overweight	higher	no	no	no	no
1805	1	control	no	no	F	57	ex smoker	no	overweight	higher	yes	no	no	no
1806	1	control	no	no	F	57	non smoker	no	obese	higher	yes	no	no	no
1807	3	control	no	no	F	57	ex smoker	no	regular	lower	no	no	no	yes
1808	6	rhinitis	no	yes	F	57	smoker	high	obese	higher	yes	no	yes	yes
1809	6	control	no	no	F	57	non smoker	no	regular	higher	yes	no	no	no
1810	6	asthma	no	no	F	57	non smoker	no	regular	higher	yes	no	no	no
1811	2	rhinitis	no	no	F	57	ex smoker	moderate	regular	higher	yes	no	no	no
1812	2	control	yes	no	F	57	non smoker	moderate	overweight	lower	yes	no	no	yes
1813	2	rhinitis	no	no	F	57	ex smoker	no	overweight	higher	yes	no	yes	yes
1814	11	rhinitis	no	no	F	57	non smoker	no	regular	higher	no	no	no	no
1815	11	rhinitis	no	no	F	57	smoker	no	regular	lower	no	no	no	yes
1816	11	bronchitis	no	yes	F	57	ex smoker	moderate	regular	higher	no	no	yes	yes
1817	11	rhinitis	no	no	F	57	ex smoker	no	overweight	higher	no	yes	yes	yes
1818	4	bronchitis	no	no	F	57	ex smoker	no	overweight	higher	yes	no	no	no
1819	4	rhinitis	no	no	F	57	non smoker	no	obese	higher	no	no	no	yes
1820	4	control	no	no	F	57	non smoker	no	obese	higher	yes	no	no	no
1821	4	rhinitis	no	no	F	57	smoker	no	overweight	higher	yes	no	no	no
1822	4	bronchitis	no	no	F	57	smoker	moderate	overweight	higher	no	no	no	yes
1823	4	control	no	no	F	57	non smoker	no	overweight	higher	no	no	no	yes
1824	7	control	no	no	F	57	ex smoker	moderate	obese	higher	yes	no	no	no
1825	7	asthma	no	no	F	57	smoker	high	regular	higher	yes	no	no	yes
1826	7	asthma	no	no	F	57	ex smoker	no	overweight	higher	no	no	yes	yes
1827	7	rhinitis	no	no	F	57	non smoker	no	obese	lower	no	yes	yes	yes
1828	7	rhinitis	no	no	F	57	non smoker	no	regular	lower	no	no	no	no
1829	7	rhinitis	yes	no	F	57	ex smoker	moderate	regular	higher	no	no	yes	no
1830	7	control	no	no	F	57	non smoker	no	overweight	higher	yes	no	no	no
1831	7	bronchitis	no	yes	F	57	ex smoker	no	overweight	lower	yes	no	yes	yes
1832	7	rhinitis	no	no	F	57	non smoker	no	overweight	higher	no	no	no	no
1833	7	bronchitis	yes	no	F	57	ex smoker	moderate	overweight	higher	no	no	yes	yes
1834	7	rhinitis	no	yes	F	57	non smoker	high	overweight	higher	yes	no	yes	no
1835	7	rhinitis	no	no	F	57	non smoker	no	regular	higher	yes	no	no	yes
1836	1	control	no	no	M	58	ex smoker	no	overweight	higher	no	no	no	yes
1837	1	control	no	no	M	58	non smoker	no	regular	higher	no		no	no
1838	3	rhinitis	no	no	M	58	non smoker	no	overweight	higher	no	no	yes	no
1839	2	asthma	no	no	M	58	non smoker	moderate	regular	lower	yes	no	no	no
1840	2	control	no	no	M	58	smoker	no	regular	higher	yes	no	no	yes
1841	2	asthma	yes	no	M	58	non smoker	no	regular	higher	no	no	yes	no
1842	2	control	no	no	M	58	non smoker	no	obese	higher	no	yes	yes	no
1843	2	control	no	no	M	58	ex smoker		overweight	lower	yes	no	yes	no
1844	2	rhinitis	no	no	M	58	ex smoker	no	obese	lower	yes	no	no	no
1845	2	rhinitis	no	no	M	58	non smoker	moderate	regular	higher	no	no	no	no
1846	11	bronchitis	no	no	M	58	smoker	high	regular	higher	yes	no	no	yes
1847	4	asthma	no	no	M	58	non smoker	no	regular	higher	no	no	no	no
1848	4	rhinitis	no	no	M	58	non smoker	moderate	regular	higher	no	no	no	no
1849	4	rhinitis	no	yes	M	58	non smoker	high	obese	higher	no	no	yes	yes
1850	4	asthma	no	no	M	58	ex smoker	no	obese	higher	no	no	no	no
1851	7	rhinitis	no	no	M	58	ex smoker	no	regular	higher	no	no	no	no
1852	7	control	no	no	M	58	non smoker	no	regular	higher	no	no	no	yes
1853	7	rhinitis	no	no	M	58	smoker	no	obese	higher	yes	no	no	no
1854	1	control	no	no	F	58	smoker	no	overweight	higher	no	no	yes	no
1855	1	control	no	no	F	58	ex smoker	no	overweight	higher	no	no	no	no
1856	1	control	no	no	F	58	ex smoker	no	overweight	higher	yes	no	no	yes
1857	6	rhinitis	no	no	F	58	ex smoker	no	overweight	higher	no	no	no	yes
1858	2	control	no	no	F	58	smoker	no	overweight	higher	yes	no	no	no
1859	11	control	no	no	F	58	smoker	no	regular	higher	no	no	no	no
1860	4	rhinitis	no	yes	F	58	smoker	no	overweight	lower	yes	no	yes	no
1861	4	rhinitis	no	yes	F	58	non smoker	no	overweight	higher	yes	no	no	yes
1862	4	rhinitis	no	no	F	58	smoker	no	overweight	higher	no	no	no	yes
1863	4	rhinitis	no	no	F	58	ex smoker	moderate	obese	higher	yes	no	yes	no
1864	4	rhinitis	no	no	F	58	non smoker	no	regular	higher	yes	no	no	yes
1865	7	rhinitis	yes	no	F	58	ex smoker	no	overweight	higher	yes	no	no	yes
1866	7	control	no	no	F	58	non smoker	no	overweight		yes	no	yes	yes
1867	7	bronchitis	yes	no	F	58	non smoker	moderate	overweight	lower	yes	no	yes	no
1868	7	rhinitis	no	no	F	58	smoker	no	regular	higher	no	no	no	yes
1869	7	asthma	yes	no	F	58	non smoker	no	regular	higher	yes	no	no	no
1870	7	control	no	no	F	58	ex smoker	moderate	overweight	higher	no	no	yes	yes
1871	7	rhinitis	no	no	F	58	non smoker	no	regular	higher	no	no	yes	no
1872	7	control	no	no	F	58	ex smoker	no	regular	higher	no	no	yes	yes
1873	7	rhinitis	yes	yes	F	58	non smoker	no	regular	lower	no	no	yes	yes
1874	7	control	no	no	F	58	non smoker	moderate	overweight	higher	no	no	yes	no
1875	1	control	no	no	M	59	non smoker	no	obese	higher	yes	no	no	no
1876	3	control	no	no	M	59	smoker	no	overweight	lower	no	no	no	yes
1877	6	rhinitis	no	no	M	59	ex smoker	moderate	regular	higher	no	no	yes	no
1878	6	control	no	no	M	59	ex smoker	no	overweight	higher	yes	yes	no	yes
1879	2	rhinitis	no	no	M	59	ex smoker		overweight	higher	yes	no	yes	no
1880	2	rhinitis	no	no	M	59	non smoker	no	regular	higher	no	no	yes	no
1881	11	bronchitis	yes	no	M	59	ex smoker	no	regular	higher	yes	no	yes	yes
1882	11	rhinitis	no	no	M	59	non smoker	no	regular	higher	no	no	no	no
1883	11	rhinitis	no	no	M	59	non smoker	moderate	overweight	lower	yes	no	yes	no
1884	4	asthma	yes	no	M	59	ex smoker	high	regular	higher	yes	no	yes	no
1885	4	asthma	no	no	M	59	ex smoker	no	overweight	lower	yes	no	yes	yes
1886	4	control	no	no	M	59	non smoker	moderate	overweight	lower	no	no	no	no
1887	4	asthma	no	no	M	59	ex smoker	high	overweight	higher	yes	no	no	no
1888	4	bronchitis	no	yes	M	59	smoker	moderate	overweight	higher	no	no	no	yes
1889	7	control	no	no	M	59	non smoker	moderate	obese	lower	no	no	yes	yes
1890	7	control	no	no	M	59	non smoker	no	regular	higher	yes	no	no	no
1891	7	rhinitis	yes	no	M	59	ex smoker	no	obese	higher	yes	no	yes	no
1892	7	control	no	no	M	59	non smoker	moderate	overweight	higher	yes	no	no	no
1893	7	control	no	yes	M	59	ex smoker	high	obese	lower	no	no	no	no
1894	7	control	no	no	M	59	non smoker	no	overweight	higher	no	no	no	no
1895	7	rhinitis	no	no	M	59	ex smoker	moderate	overweight	higher	yes	no	no	no
1896	7	asthma	yes	no	M	59	ex smoker	high	obese	lower	no	no	yes	yes
1897	7	control	no	no	M	59	ex smoker	moderate	regular	higher	no	no	no	no
1898	7	asthma	no	no	M	59	smoker	moderate	regular	higher	yes	no	no	yes
1899	7	rhinitis	no	no	M	59	ex smoker	moderate	regular	higher	no	no	no	no
1900	1	control	no	no	F	59	ex smoker	no	obese	higher	no	no	no	no
1901	3	asthma	no	no	F	59	smoker	no	regular	higher	no	no	no	no
1902	3	asthma	no	yes	F	59	smoker	moderate	overweight	lower	yes	no	yes	yes
1903	3	rhinitis	no	no	F	59	non smoker	no	regular	higher	yes	no	no	no
1904	6	control	no	no	F	59	non smoker	no	regular	higher	yes	no	yes	yes
1905	6	rhinitis	no	no	F	59	non smoker	no	regular	lower	no	no	yes	yes
1906	6	rhinitis	no	yes	F	59	ex smoker	no	regular	higher	no	no	no	yes
1907	2	control	no	no	F	59	smoker	high	overweight	higher	yes	no	no	no
1908	2	control	no	no	F	59	non smoker	no	regular	higher	no	no	no	no
1909	2	control	no	no	F	59	ex smoker	no	obese	higher	yes	no	yes	no
1910	2	rhinitis	no	no	F	59	ex smoker	moderate	regular	higher	no	no	no	no
1911	2	control	no	no	F	59	non smoker	no	regular	higher	yes	no	no	yes
1912	2	rhinitis	no	no	F	59	ex smoker	no	regular	lower	no	no	no	no
1913	11	rhinitis	no	no	F	59	ex smoker	no	overweight	higher	no	no	no	no
1914	11	rhinitis	no	no	F	59	non smoker	no	overweight	higher	yes	no	no	no
1915	4	asthma	no	no	F	59	smoker	no	regular	higher	no	no	no	no
1916	4	control	no	no	F	59	non smoker	no	overweight	lower	yes	no	no	no
1917	4	bronchitis	yes	no	F	59	smoker	no	overweight	lower	yes	no	yes	no
1918	7	bronchitis	no	no	F	59	non smoker	no	overweight	higher	no	no	no	yes
1919	7	rhinitis	no	no	F	59	non smoker	no	regular	lower	no	no	no	no
1920	7	rhinitis	no	no	F	59	ex smoker	no	regular	lower	no	no	no	no
1921	7	control	no	no	F	59	non smoker	moderate	overweight	higher	yes	no	no	yes
1922	7	rhinitis	no	no	F	59	smoker	no	regular	higher	yes	no	no	yes
1923	7	rhinitis	no	no	F	59	non smoker	no	regular	higher	no	no	yes	yes
1924	7	bronchitis	no	no	F	59	non smoker	no	overweight	higher	yes	no	no	no
1925	7	control	no	no	F	59	non smoker	no	regular	higher	no	no	no	yes
1926	7	rhinitis	no	no	F	59	ex smoker	no	regular	higher	yes	no	no	yes
1927	7	control	no	no	F	59	smoker	no	regular	lower	no	no	yes	yes
1928	7	rhinitis	no	no	F	59	ex smoker	moderate		higher	no	no	no	yes
1929	7	control	yes	no	F	59	ex smoker	moderate	overweight	lower	no	no	no	yes
1930	7	control	no	no	F	59	ex smoker	moderate	regular	higher	yes	no	no	no
1931	7	control	no	no	F	59	non smoker	moderate	regular	higher	yes	no	no	no
1932	1	rhinitis	no	no	M	60	non smoker	high	overweight	higher	no	no	no	no
1933	1	control	no	no	M	60	non smoker	moderate	overweight	higher	yes	no	yes	no
1934	3	control	no	no	M	60	smoker	no	regular	higher	yes	no	no	yes
1935	3	control	no	no	M	60	smoker	no	overweight	lower	no	no	no	no
1936	6	asthma	yes	no	M	60	ex smoker	high	obese	higher	yes	no	yes	yes
1937	6	rhinitis	no	no	M	60	non smoker	high	regular	higher	no	no	no	yes
1938	6	control	no	yes	M	60	smoker	moderate	overweight	higher	yes	yes	no	yes
1939	2	control	no	no	M	60	non smoker	moderate	overweight	lower	yes	no	yes	no
1940	2	rhinitis	no	no	M	60	smoker	no	regular	higher	yes	no	no	no
1941	2	rhinitis	no	no	M	60	ex smoker		overweight	lower	yes	yes	yes	yes
1942	4	control	yes	no	M	60	ex smoker	moderate	overweight	higher	yes	no	yes	yes
1943	4	control	no	no	M	60	ex smoker	no	regular	lower	no	no	no	no
1944	4	rhinitis	no	no	M	60	non smoker	moderate	regular	higher	no	no	no	no
1945	7	control	yes	no	M	60	ex smoker	moderate	overweight	higher	yes	no	yes	yes
1946	7	asthma	no	no	M	60	ex smoker	no	overweight	higher	no	no	no	yes
1947	7	control	no	no	M	60	non smoker	no	overweight	higher	no	no	no	no
1948	7	asthma	no	no	M	60	ex smoker	moderate	overweight	higher	no	no	yes	yes
1949	7	bronchitis	no	no	M	60	smoker	high	overweight	higher	no	no	no	no
1950	7	rhinitis	no	no	M	60	ex smoker	moderate	overweight	higher	yes	no	no	yes
1951	7	rhinitis	no	no	M	60	ex smoker	moderate	overweight	higher	yes	no	yes	yes
1952	7	rhinitis	no	no	M	60	ex smoker	high	obese	higher	yes	no	yes	no
1953	7	control	no	no	M	60	ex smoker	no	overweight	higher	yes	no	yes	no
1954	7	rhinitis	no	no	M	60	smoker	high	regular	higher	yes	no	yes	no
1955	7	control	no	no	M	60	ex smoker	high	overweight	higher	no	no	no	no
1956	7	bronchitis	no	no	M	60	non smoker	high	overweight	higher	no	no	yes	no
1957	7	asthma	no	no	M	60	non smoker	moderate	overweight	lower	yes	no	no
1958	7	control	no	no	M	60	ex smoker		overweight	higher	no	no	no	no
1959	7	control	no	no	M	60	non smoker	high	regular	higher	no	no	yes	yes
1960	7	rhinitis	no	no	M	60	non smoker	moderate	regular	higher	yes	no	no	no
1961	1	control	no	no	F	60	non smoker	no	obese	higher	yes	no	yes	no
1962	3	control	yes	no	F	60	ex smoker	no	overweight	higher	yes	no	no	no
1963	6	rhinitis	yes	no	F	60	smoker	no	overweight	higher	yes	no	yes	no
1964	4	bronchitis	yes	no	F	60	non smoker	no	overweight	higher	yes	no	no	yes
1965	4	control	no	no	F	60	ex smoker	no	regular	lower	yes	no	no	no
1966	4	control	no	no	F	60	non smoker	no	regular	lower	yes	no	no	no
1967	4	bronchitis	yes	no	F	60	non smoker	no	overweight	higher	yes	no	yes	no
1968	4	control	no	no	F	60	smoker		regular	higher	no	no	no	yes
1969	4	rhinitis	yes	no	F	60	non smoker	no		higher	yes	no	no	no
1970	4	rhinitis	no	yes	F	60	smoker	no	regular	lower	no	no	no	yes
1971	7	control	no	no	F	60	smoker	no	overweight	lower	yes	no	no	yes
1972	7	control	no	no	F	60	non smoker	no	obese	higher	yes	no	yes	yes
1973	7	rhinitis	no	no	F	60	smoker	no	regular	higher	no	no	no	no
1974	7	rhinitis	no	no	F	60	non smoker	no	overweight	higher	yes	no	no	no
1975	7	control	no	no	F	60	smoker	high	regular	higher	no	no	no	yes
1976	7	control	yes	no	F	60	non smoker	no	obese	lower	yes	no	yes	yes
1977	7	control	no	no	F	60	non smoker	no	regular	higher	no	no	no	no
1978	7	control	yes	yes	F	60	non smoker	no	overweight	lower	yes	no	yes	yes
1979	7	control	no	no	F	60	ex smoker	no	regular	lower	yes	no	no	no
1980	7	rhinitis	yes	no	F	60	non smoker	no	obese	lower	no	no	no	no
1981	7	control	yes	no	F	60	non smoker	no	obese	higher	yes	yes	yes	no
1982	7	asthma	no	yes	F	60	ex smoker	no	obese	higher	no	no	yes	no
1983	7	bronchitis	no	no	F	60	ex smoker	no	overweight	higher	no	no	no	no
1984	7	control	no	no	F	60	ex smoker	no	regular	higher	no	no	yes	yes
1985	1	rhinitis	no	no	M	61	non smoker	no	overweight	higher	no	no	no	no
1986	1	control	no	no	M	61	non smoker	no	overweight	higher	yes	no	yes	no
1987	1	control	no	no	M	61	non smoker	no	overweight	higher	yes	no	no	no
1988	1	control	no	no	M	61	non smoker	no	overweight	higher	no	no	yes	yes
1989	2	rhinitis	no	no	M	61	non smoker		obese	higher	no	no	yes	no
1990	2	rhinitis	no	no	M	61	ex smoker	moderate	regular	higher	no	no	no	yes
1991	2	control	no	no	M	61	non smoker	moderate	regular	higher	no	no	no	no
1992	2	control	no	no	M	61	ex smoker		obese	higher	no	no	yes	yes
1993	2	rhinitis	yes	no	M	61	ex smoker	high	regular	lower	yes	no	no	no
1994	4	control	no	no	M	61	ex smoker	no	regular	higher	yes	no	no	no
1995	4	control	no	no	M	61	ex smoker	moderate	regular	higher	no	no	no	no
1996	4	control	no	no	M	61	ex smoker	no	obese	lower	yes	no	yes	yes
1997	7	control	no	no	M	61	non smoker	no	obese	higher	yes	no	yes	yes
1998	7	control	yes	no	M	61	ex smoker	moderate	obese	higher	no	no	yes	yes
1999	7	rhinitis	no	no	M	61	non smoker	moderate	overweight	higher	yes	no	no	no
[truncated: 464 more rows]
